# Supplementary material for: Self-powered H2 production with bifunctional hydrazine as sole consumable
Source: PubMed Central journal article supplement (PMC6195518; doi:10.1038/s41467-018-06815-9), 2018-10-19
Supplement: 41467_2018_6815_MOESM1_ESM.pdf [file 41467_2018_6815_MOESM1_ESM.pdf]

## Supplementary Information

**Self-powered H<sub>2</sub> production with bifunctional hydrazine as  
sole consumable**

**By Liu et al.**

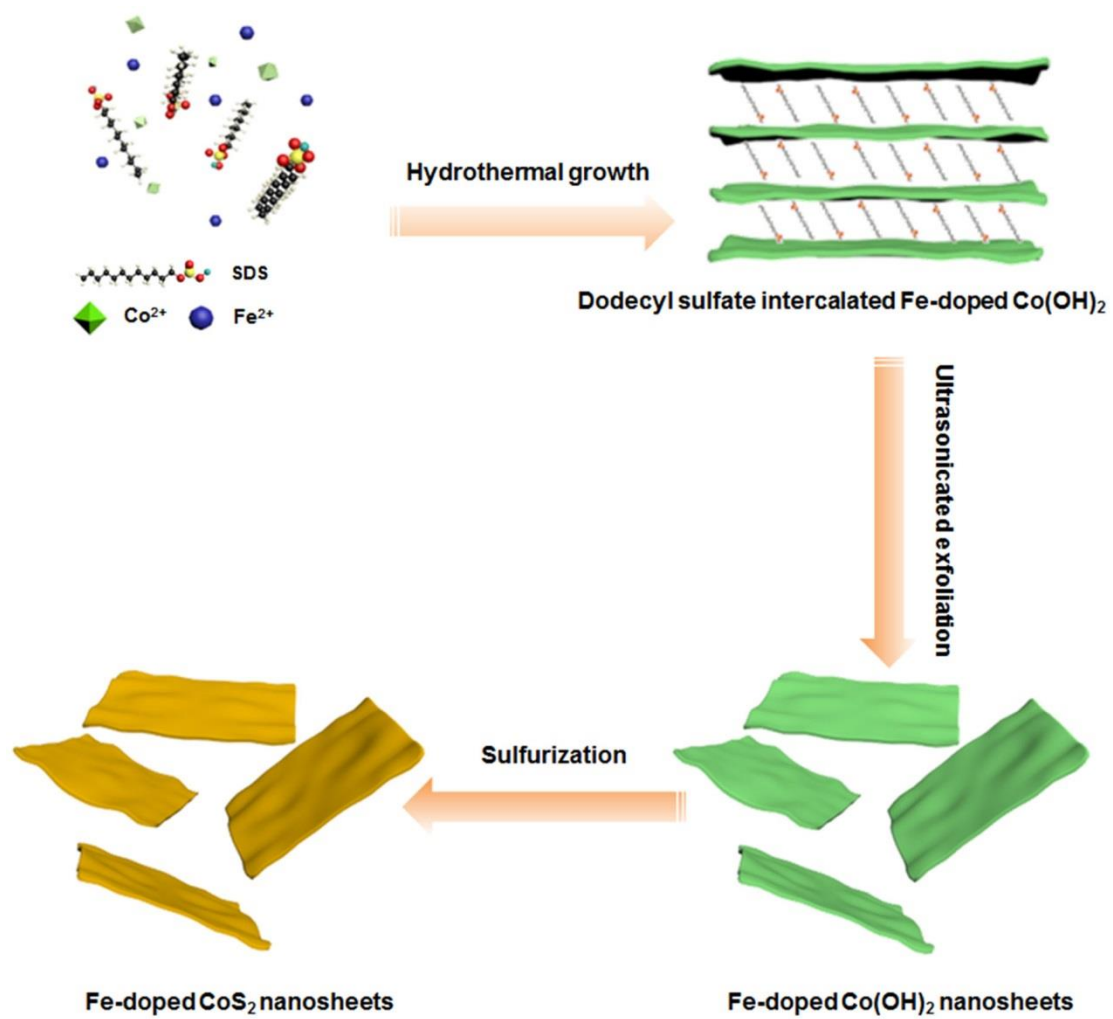

**Supplementary Figure 1 | Schematic illustration of the preparation procedure of the Fe-doped  $\text{CoS}_2$  nanosheets.** SDS is sodium dodecyl sulfate. When no  $\text{Fe}^{2+}$  ions were introduced, pure  $\text{Co}(\text{OH})_2$  and then pure  $\text{CoS}_2$  nanosheets were obtained.

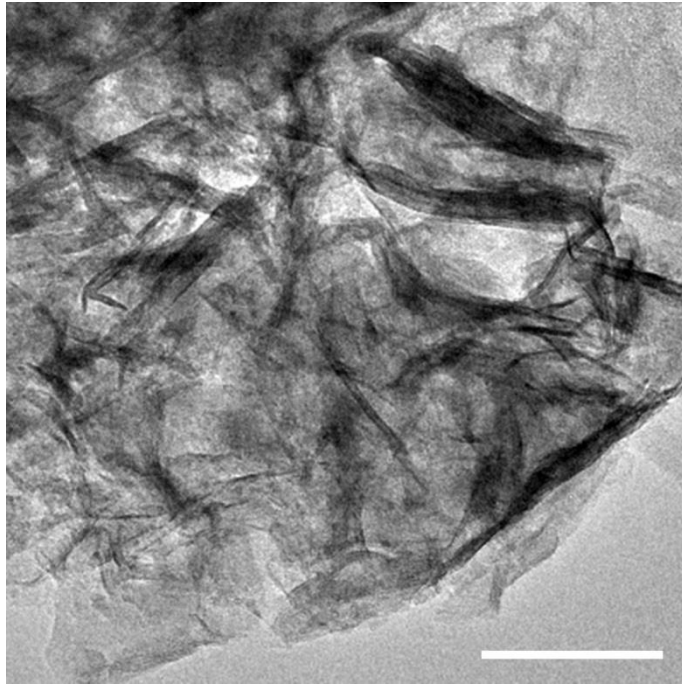

**Supplementary Figure 2 | TEM image of the Fe-doped  $\text{Co(OH)}_2$  nanosheets.** These Fe-doped  $\text{Co(OH)}_2$  nanosheets are those mentioned in Supplementary Fig. 1. Scale bar, 50 nm.

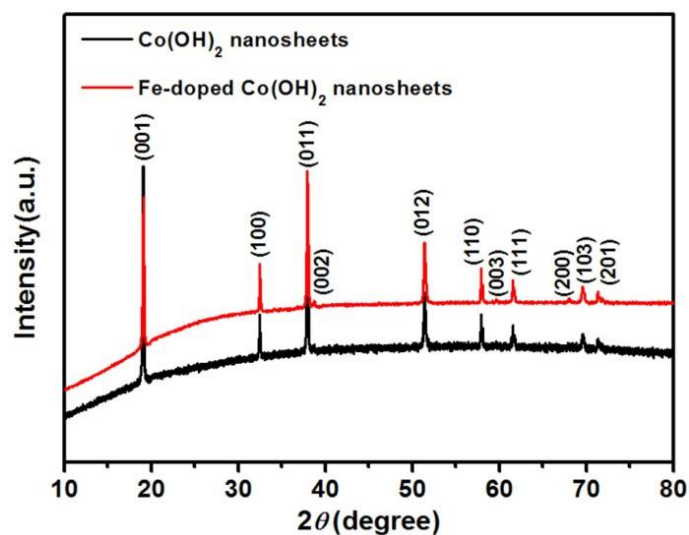

**Supplementary Figure 3 | XRD patterns of the Fe-doped and the pure  $\text{Co(OH)}_2$  nanosheet precursors.** Both of the two patterns can be unambiguously indexed to the standard  $\text{Co(OH)}_2$ , according to No. 74-1057 Powder Diffraction File (PDF). This indicates that the Fe content is low enough not to disturb the  $\text{Co(OH)}_2$  crystal lattice of the Fe-doped  $\text{Co(OH)}_2$ .

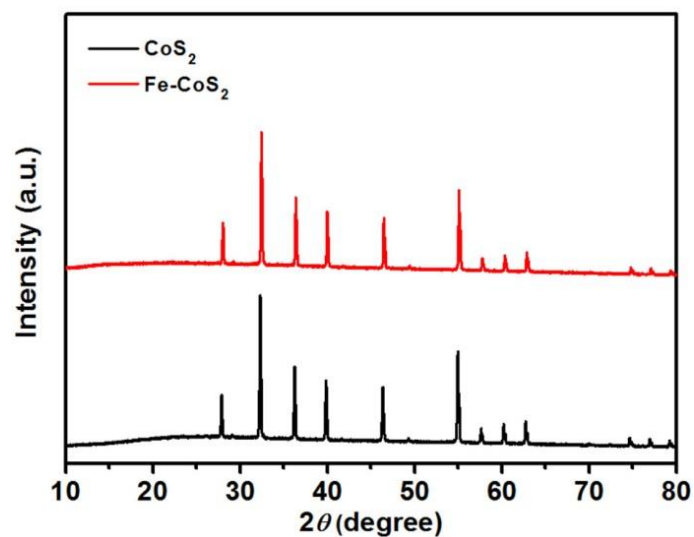

**Supplementary Figure 4 | XRD patterns of the pure CoS<sub>2</sub> nanosheets and the Fe-CoS<sub>2</sub> ones, which are identical.** Note that the red pattern here is the same one as the black one in Fig. 1a.

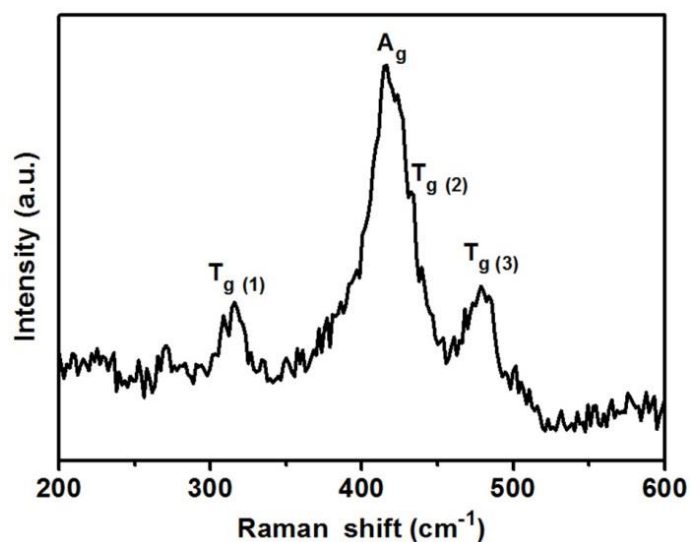

**Supplementary Figure 5 | Raman spectrum of the Fe-CoS<sub>2</sub> nanosheets.** The Raman bands at 314, 415, 435 and 478 cm<sup>-1</sup> can be assigned to the T<sub>g(1)</sub>, A<sub>g</sub>, T<sub>g(2)</sub> and T<sub>g(3)</sub> vibrational modes of CoS<sub>2</sub> (ref. 1).

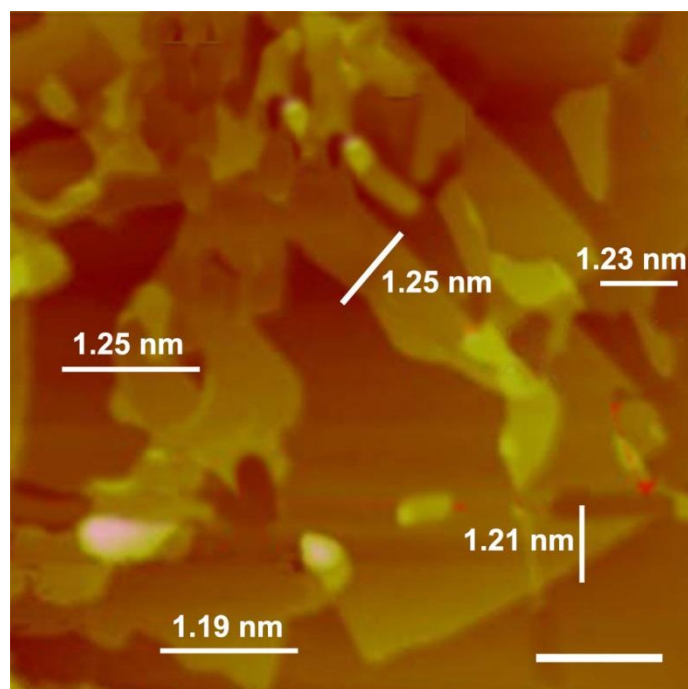

**Supplementary Figure 6 | Additional AFM image of the Fe-CoS<sub>2</sub> nanosheets.** The thickness values here, along with the four in Fig. 1c, d, give the average thickness and standard deviation to be 1.22 and 0.03 nm, respectively. Scale bar, 50 nm.

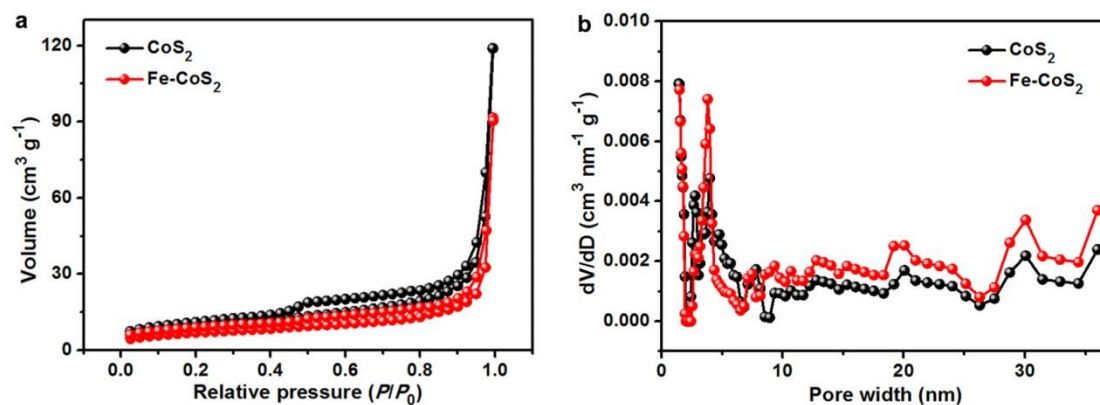

**Supplementary Figure 7 | N<sub>2</sub>-sorption isotherms and pore size distribution curves of the CoS<sub>2</sub> nanosheets and the Fe-CoS<sub>2</sub> ones. a** N<sub>2</sub>-sorption isotherms. **b** Pore size distribution curves.  $P$  is the pressure of N<sub>2</sub> in the sample cell of the analyzer instrument (see more details in Methods) when equilibrium is achieved, and  $P_0$  is the saturation pressure of N<sub>2</sub> at the analysis temperature. The isotherms give the specific surface area values of CoS<sub>2</sub> and Fe-CoS<sub>2</sub> to be 25.3 and 27.2 m<sup>2</sup> g<sup>-1</sup>, respectively. The two values are close to each other. The pore size distribution curves indicate the presence of micropores (<2 nm) and mesopores (2~50 nm) in both of CoS<sub>2</sub> and Fe-CoS<sub>2</sub>. These findings confirm that the Fe doping did not change the morphology and structure of the nanosheets, which is consistent with the XRD (Fig. 1a and Supplementary Fig. 4), Raman (Supplementary Fig. 5), and HRTEM (Fig. 1f) results.



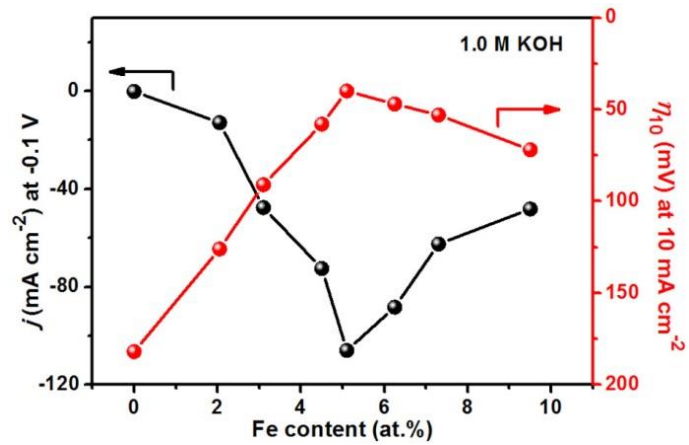

**Supplementary Figure 8 | Dependences of the HER electrocatalytic current density ( $j$ ) and overpotential ( $\eta$ ) of the Fe-CoS<sub>2</sub> catalyst on the atomic percentage of Fe. The  $j$  and  $\eta$  values were measured in 1.0 M KOH at the working potential of  $-0.1$  V and the current density of  $10 \text{ mA cm}^{-2}$ , respectively.  $\eta_{10}$  denotes  $\eta$  measured at the current density of  $10 \text{ mA cm}^{-2}$ . Larger  $j$  and smaller  $\eta$  values indicate higher HER activities.**

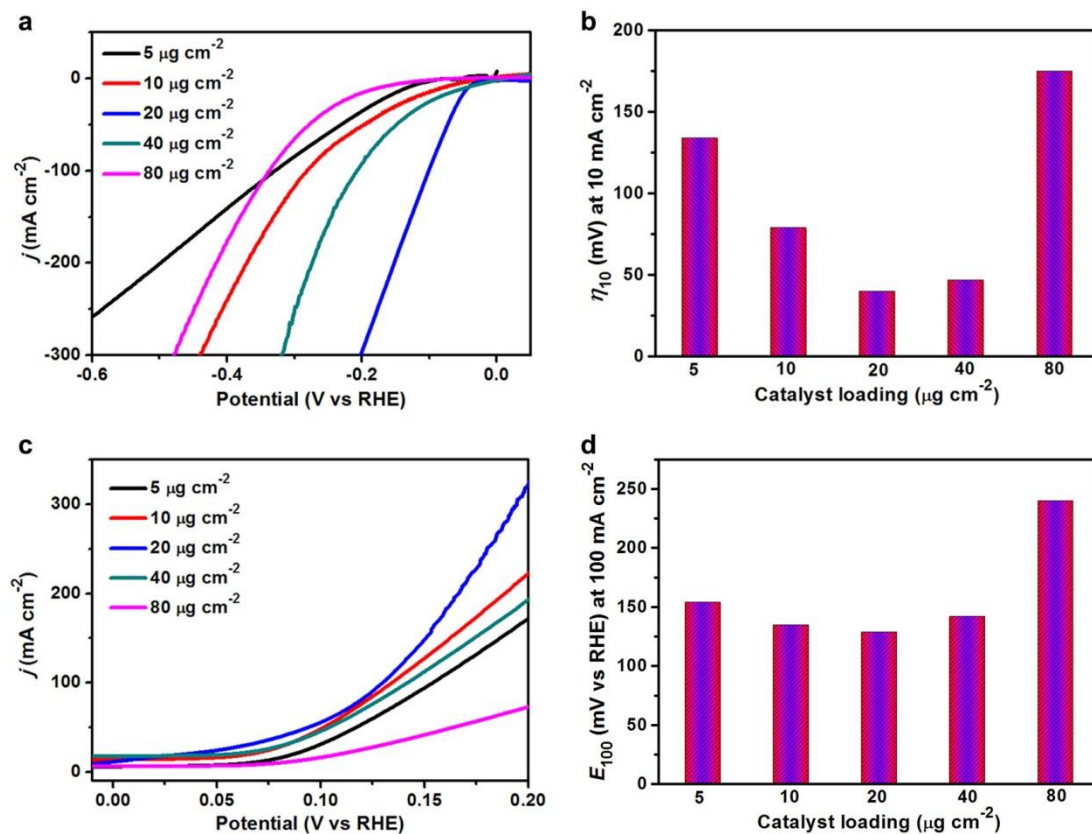

**Supplementary Figure 9 | HER and HzOR performances of the Fe-CoS<sub>2</sub> nanosheets at different loadings.** **a, b** HER polarization curves at different loadings (**a**) and the corresponding required  $\eta$  values for 10 mA cm<sup>-2</sup> (**b**), in which  $\eta$  for 10 mA cm<sup>-2</sup> is denoted as  $\eta_{10}$ . **c, d** have the same meanings as **a, b** but for HzOR.  $E_{100}$  has the same meaning as that in the main text, which means the potential for 100 mA cm<sup>-2</sup>. Note that the blue curves in Fig. 2a, d are redrawn here as the blue ones in **a** and **c**, respectively. The measurement conditions of **a** and **c** are the same as those of Fig. 2a, d, respectively. The results here show that when the loading increased, the  $\eta_{10}$  or  $E_{100}$  value initially decreased, reached the lowest point at 20  $\mu\text{g cm}^{-2}$  and then increased. These changes indicate that the HER and the HzOR performances of Fe-CoS<sub>2</sub> were the highest at 20  $\mu\text{g cm}^{-2}$ . Thus, we used this loading for the HER and the HzOR experiments in the main text. In addition, the increase of  $\eta_{10}$  or  $E_{100}$  after 20  $\mu\text{g cm}^{-2}$  was possibly due to the slow electron-transfer kinetics caused by the over-loading of catalysts<sup>2</sup>.

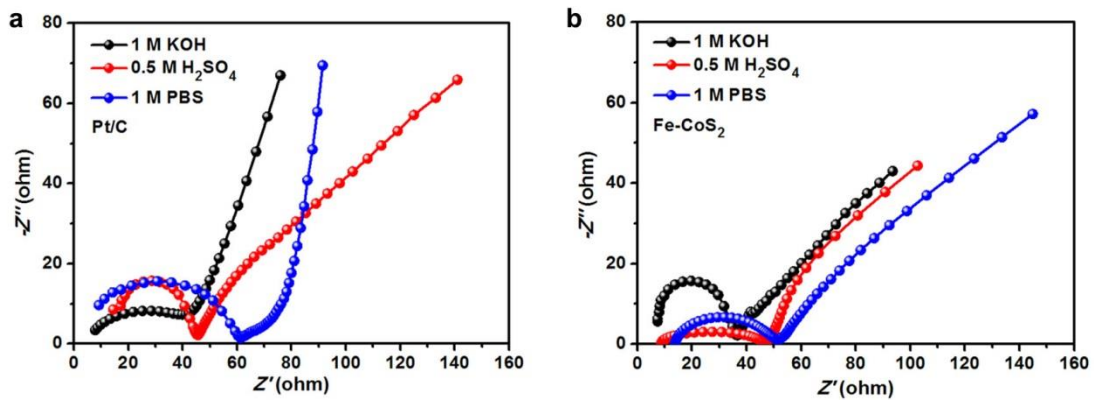

**Supplementary Figure 10 | EIS plots at the applied potential of  $-0.25$  V. a** EIS plots of 20 wt.% Pt/C. **b** EIS plots of the Fe-CoS<sub>2</sub> nanosheets. The EIS spectra give the charge transfer resistance ( $R_{ct}$ ) values of Fe-CoS<sub>2</sub> to be 24.2  $\Omega$  (1.0 M KOH), 35.5  $\Omega$  (1.0 M PBS) and 39.2  $\Omega$  (0.5 M H<sub>2</sub>SO<sub>4</sub>) and those of Pt/C to be 47.3  $\Omega$  (1.0 M KOH), 56.4  $\Omega$  (1.0 M PBS) and 25.8  $\Omega$  (0.5 M H<sub>2</sub>SO<sub>4</sub>).

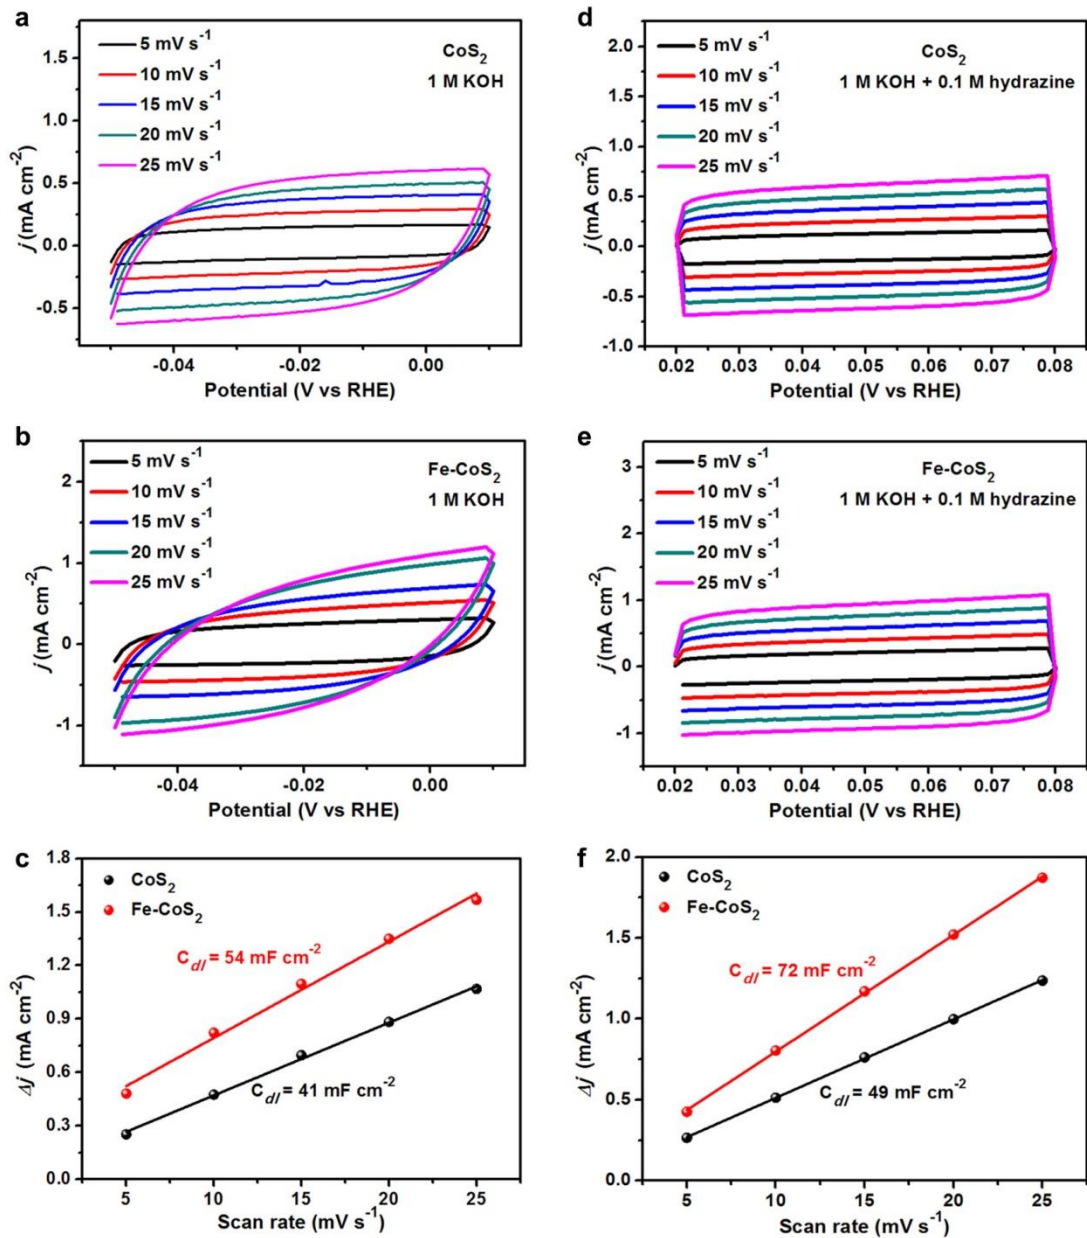

**Supplementary Figure 11 |  $C_{dl}$  measurements corresponding to the HER and the HzOR experiments. a, b** Cyclic voltammogram (CV) curves at the scan rates of 5, 10, 15, 20 and 25  $\text{mV s}^{-1}$  in the potential range without Faradaic processes for measuring  $C_{dl}$  of the  $\text{CoS}_2$  nanosheets and the  $\text{Fe-CoS}_2$  ones. The other measurement conditions are the same as those of the HER measurements in Fig. 2a. **c** Capacitive current ( $\Delta j$ ) at  $-0.02$  V against the scan rate, in which the labeled  $C_{dl}$  values were

obtained by the linear fittings on the plots. The  $\Delta j$  values are from the curves in **a**, **b**. **d–f** have the same meanings as **a–c** but are corresponding to the HzOR measurements in Fig. 2d. The working potential corresponding to the  $\Delta j$  values in (f) is 0.05 V. By the  $C_{dl}$  values, the ECSA values of  $\text{CoS}_2$  and  $\text{Fe-CoS}_2$  were derived<sup>3–5</sup> to be 683 and 900  $\text{cm}^2$ , respectively, for the HER, and 817 and 1,200  $\text{cm}^2$ , respectively, for the HzOR. The two pairs of ECSA values indicate the presence of more active surface areas on  $\text{Fe-CoS}_2$  than on  $\text{CoS}_2$ , in a good agreement with the better HER and HzOR activities of  $\text{Fe-CoS}_2$  than  $\text{CoS}_2$  (Fig. 2a, d).

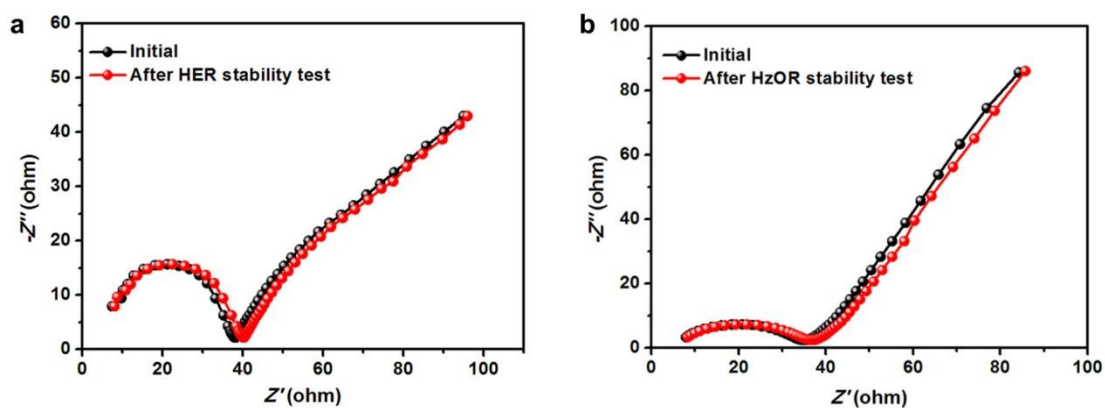

**Supplementary Figure 12 | EIS plots of the Fe-CoS<sub>2</sub> nanosheets before and after the chronoamperometric measurements (namely the HER- and HzOR-stability experiments in Fig. 2c, f) at an open-circuit potential. a** EIS plots before and after the HER chronoamperometric measurement. **b** EIS plots before and after the HzOR chronoamperometric measurement. The two spectra before and after the HER chronoamperometric stability test are almost identical to each other. So are the two before and after the HzOR chronoamperometric stability test. These results indicate that Fe-CoS<sub>2</sub> has stable electrocatalytic kinetics through the stability tests.

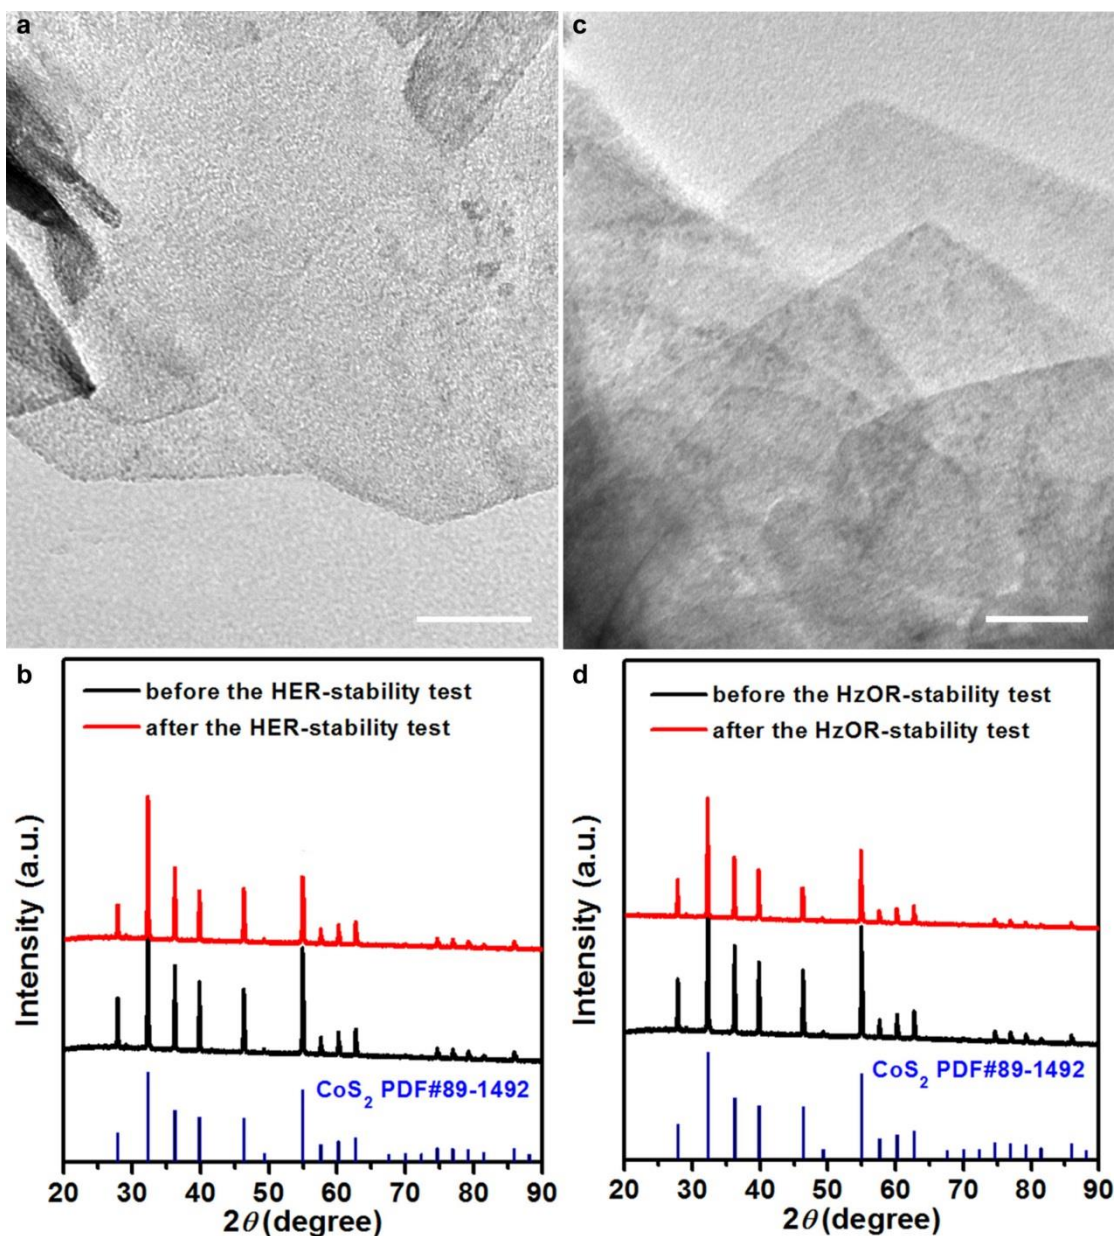

**Supplementary Figure 13 | TEM images and XRD patterns of the Fe-CoS<sub>2</sub> nanosheets after the stability tests. a, b** TEM image and XRD pattern after the HER-stability test. **c, d** TEM image and XRD pattern after the HzOR-stability test. Note that the black patterns in **b** and **d** are the same black one in Fig. 1a, the standard pattern of CoS<sub>2</sub> is added in blue in **b** and **d**, and they are redrawn here for comparison. Comparing these results and Fig. 1a, **b** shows that the Fe-CoS<sub>2</sub> nanosheets preserve the same structure and morphology before and after the

chronoamperometric experiments, indicating their structural stability. Scale bars in **a** and **c** are 50 nm.



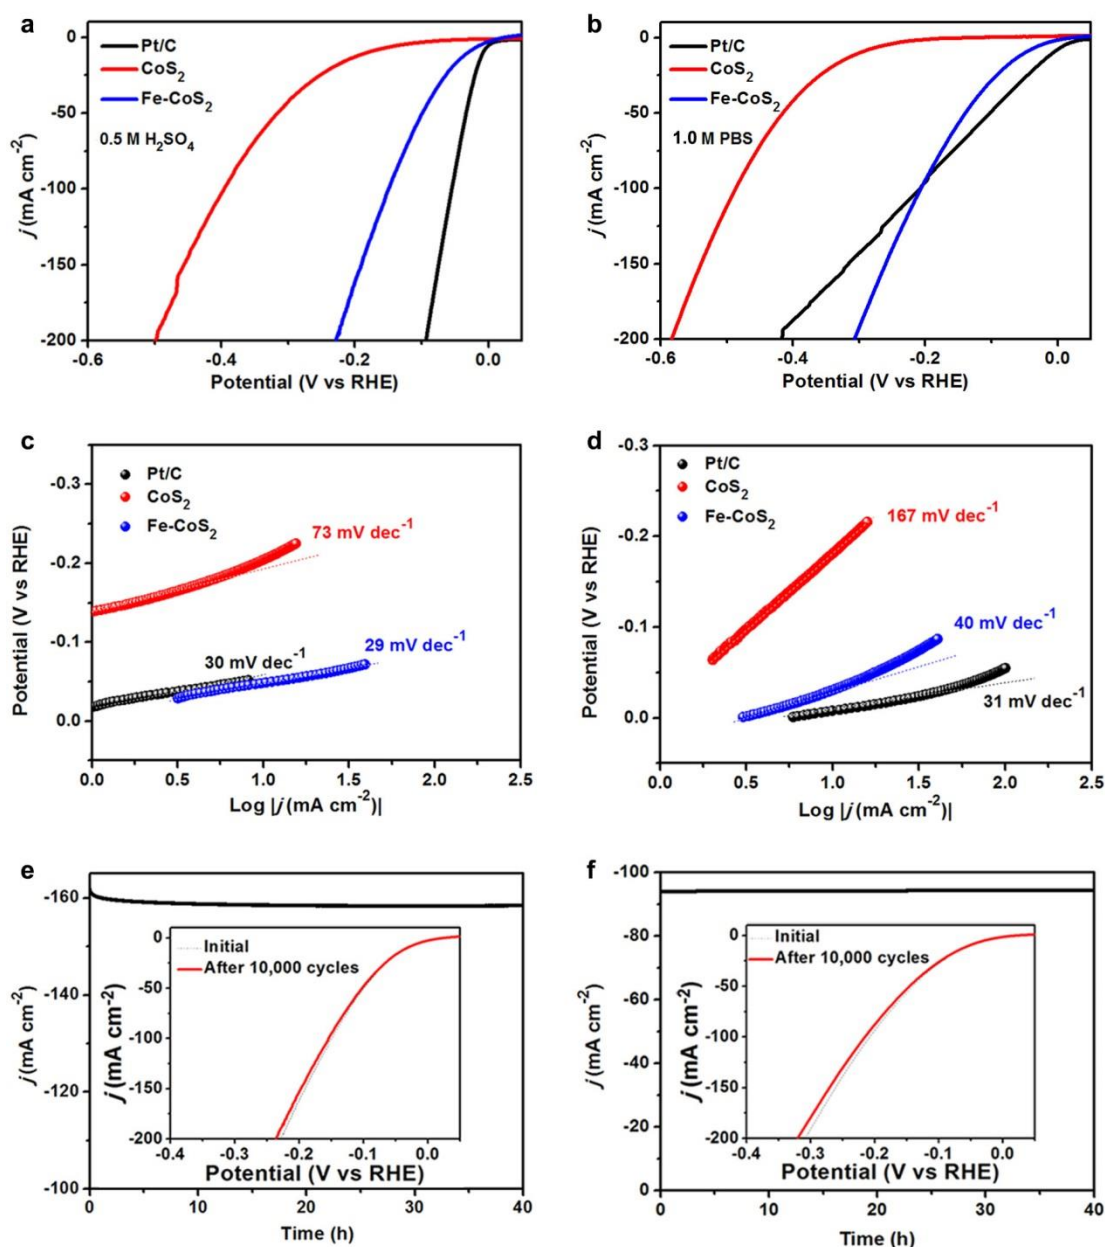

**Supplementary Figure 14 | Electrochemical performances of the Fe-CoS<sub>2</sub> nanosheets for HER.** **a, b** HER polarization curves of 20 wt.% Pt/C, the pure CoS<sub>2</sub> nanosheets and the Fe-CoS<sub>2</sub> ones in 0.5 M H<sub>2</sub>SO<sub>4</sub> and 1.0 M PBS. **c, d** Tafel plots corresponding to **a, b**. **e, f** Chronoamperometric curves recorded on the Fe-CoS<sub>2</sub> nanosheets for 40 h at a constant working potential of -0.2 V for HER in 0.5 M H<sub>2</sub>SO<sub>4</sub> and 1.0 M PBS. The insets in **e** and **f** are the HER polarization curves of the Fe-CoS<sub>2</sub>

nanosheets before and after 10,000 potential cycles in 0.5 M H<sub>2</sub>SO<sub>4</sub> and 1.0 M PBS, respectively. It should be noted that in 1.0 M PBS, Pt/C exhibited a typical 0 mV overpotential at the onset position, and its corresponding HER current density started to increase from 0 earlier and faster than that of Fe-CoS<sub>2</sub>; but, when the applied potential was increased further, the increase rate of the HER current density of Pt/C was lower than that of Fe-CoS<sub>2</sub>, due to the larger charge transfer resistance of Pt/C (see Supplementary Fig. 10 for details); thus, after the applied potential was increased to be larger than a critical value (that is, the HER current density was larger than a critical value), the HER current density of Fe-CoS<sub>2</sub> started to be larger than that of Pt/C, as displayed in **b** here, showing better HER activities than Pt/C. In contrast, in 0.5 M H<sub>2</sub>SO<sub>4</sub>, the charge transfer resistance of Fe-CoS<sub>2</sub> is larger than that of Pt/C (see Supplementary Fig. 10 for details), and thus its HER activities were always worse than those of Pt/C, as displayed in **a** here.

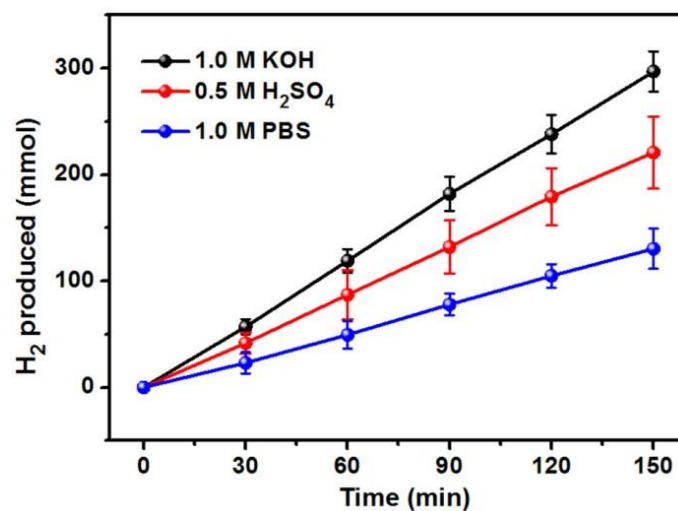

**Supplementary Figure 15 | Actual H<sub>2</sub> yields catalyzed by the Fe-CoS<sub>2</sub> nanosheets at a constant  $j_{\text{HER}}$  of 50 mA cm<sup>-2</sup>, and their linear fitting results.** The error bars represent the standard deviations of the yields. The Faradaic efficiency (FE) of the Fe-CoS<sub>2</sub> nanosheets for the generation of H<sub>2</sub> during an HER process can be obtained from the H<sub>2</sub> yield using the formula  $\text{FE} (\%) = 2n_{\text{H}_2} / (j_{\text{HER}}t)$ , where  $n_{\text{H}_2}$  is the H<sub>2</sub> yield and  $t$  is the HER time<sup>6-8</sup>.

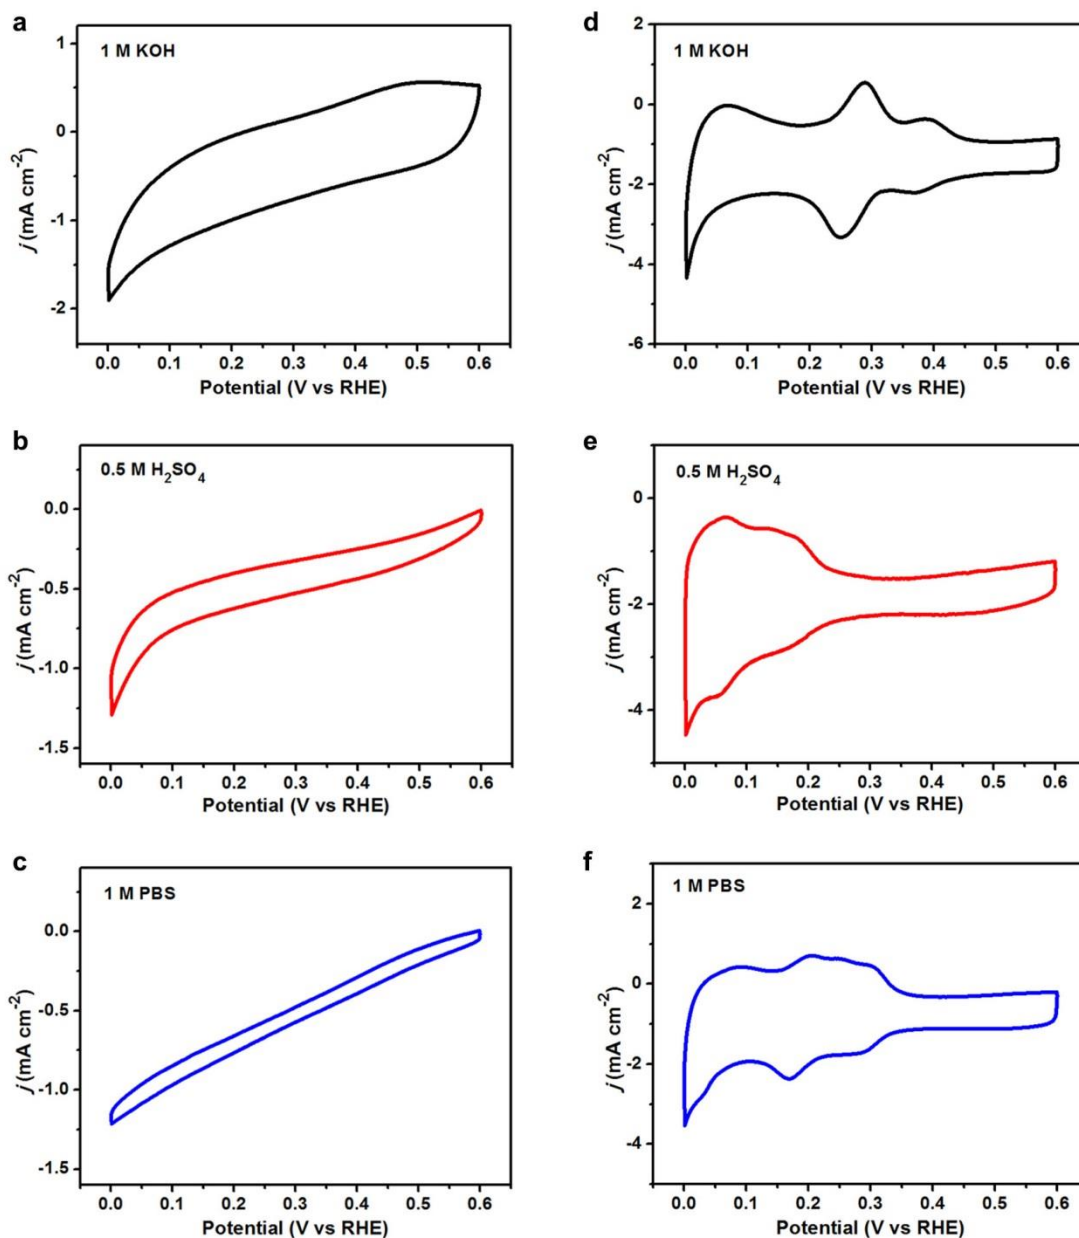

**Supplementary Figure 16 | CV curves measured in different electrolytes. a–c** CV curves of the Fe-CoS<sub>2</sub> nanosheets. **d–f** CV curves of Pt/C. By the curves in **a–c** here (see more details in Methods), the  $Q_s$  values of Fe-CoS<sub>2</sub> were measured to be  $7.28 \times 10^{-3} \text{ C cm}^{-2}$  (1.0 M KOH),  $5.32 \times 10^{-3} \text{ C cm}^{-2}$  (0.5 M H<sub>2</sub>SO<sub>4</sub>) and  $6.44 \times 10^{-3} \text{ C cm}^{-2}$  (1.0 M PBS). Thus, the  $n$  values of Fe-CoS<sub>2</sub> were calculated to be  $7.54 \times 10^{-8} \text{ mol cm}^{-2}$  (1.0 M KOH),  $5.51 \times 10^{-8} \text{ mol cm}^{-2}$  (0.5 M H<sub>2</sub>SO<sub>4</sub>) and  $6.67 \times 10^{-8} \text{ mol cm}^{-2}$  (1.0 M

PBS). Similarly, by the curves in **d-f** here, the  $Q_s$  values of Pt/C were measured to be  $1.69 \times 10^{-2} \text{ C cm}^{-2}$  (1.0 M KOH),  $1.94 \times 10^{-2} \text{ C cm}^{-2}$  (0.5 M  $\text{H}_2\text{SO}_4$ ) and  $1.20 \times 10^{-2} \text{ C cm}^{-2}$  (1.0 M PBS). Thus, the  $n$  values of Pt/C were calculated to be  $1.75 \times 10^{-7} \text{ mol cm}^{-2}$  (1.0 M KOH),  $2.01 \times 10^{-7} \text{ mol cm}^{-2}$  (0.5 M  $\text{H}_2\text{SO}_4$ ) and  $1.24 \times 10^{-7} \text{ mol cm}^{-2}$  (1.0 M PBS).

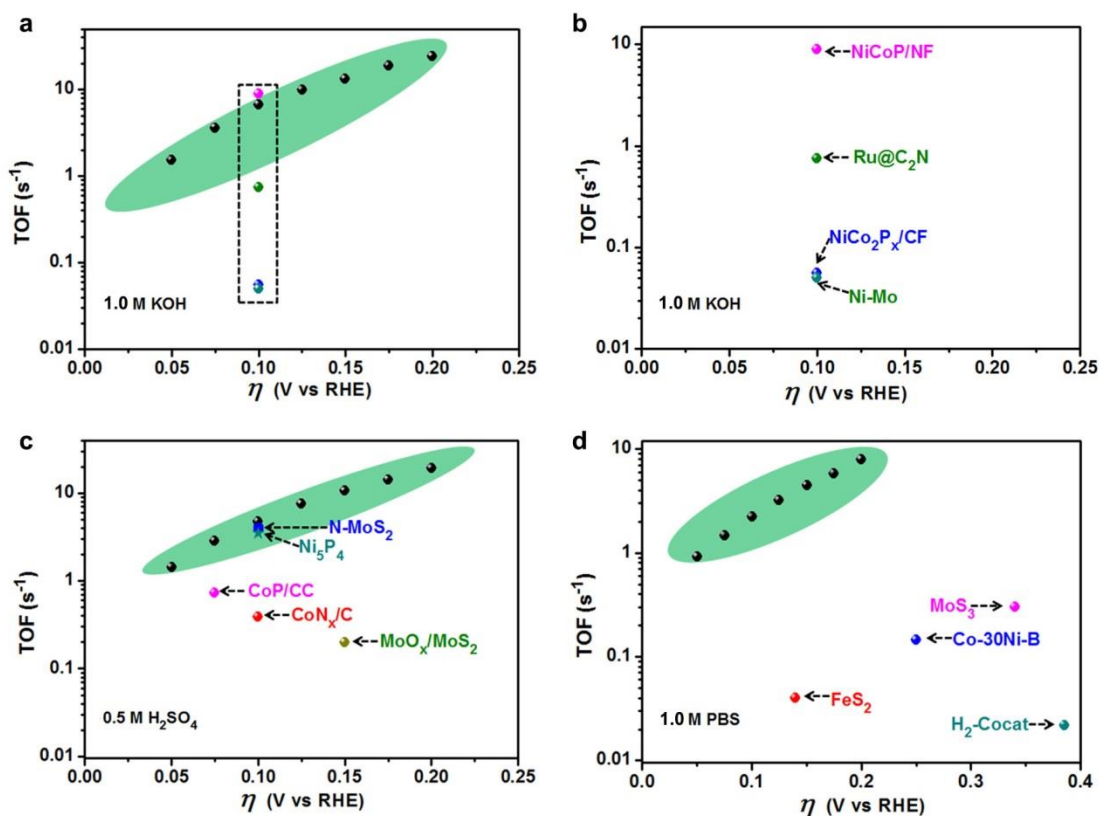

**Supplementary Figure 17 | Comparison of the TOF values of different electrocatalysts for HER. a–d** TOF values of the Fe-CoS<sub>2</sub> nanosheets (denoted by the black dots and highlighted by the light-green-coloured area) and other recent HER electrocatalysts (denoted by the color dots; their names are labeled) in 1.0 M KOH (**a**, **b**), 0.5 M H<sub>2</sub>SO<sub>4</sub> (**c**) and 1.0 M PBS (**d**). **b** is an enlargement of the boxed area in **a**. Data adapted from: ref. 9 for NiCoP/NF; ref. 10 for Ru@C<sub>2</sub>N; ref. 11 for NiCo<sub>2</sub>P<sub>x</sub>/CF; ref. 12 for Ni-Mo; ref. 13 for CoN<sub>x</sub>/C; ref. 14 for N-MoS<sub>2</sub>; ref. 15 for Ni<sub>5</sub>P<sub>4</sub>; ref. 16 for CoP/CC; ref. 17 for MoO<sub>x</sub>/MoS<sub>2</sub>; ref. 18 for FeS<sub>2</sub>; ref. 19 for Co-30Ni-B; ref. 20 for H<sub>2</sub>-Cocat.; ref. 21 for MoS<sub>3</sub>.

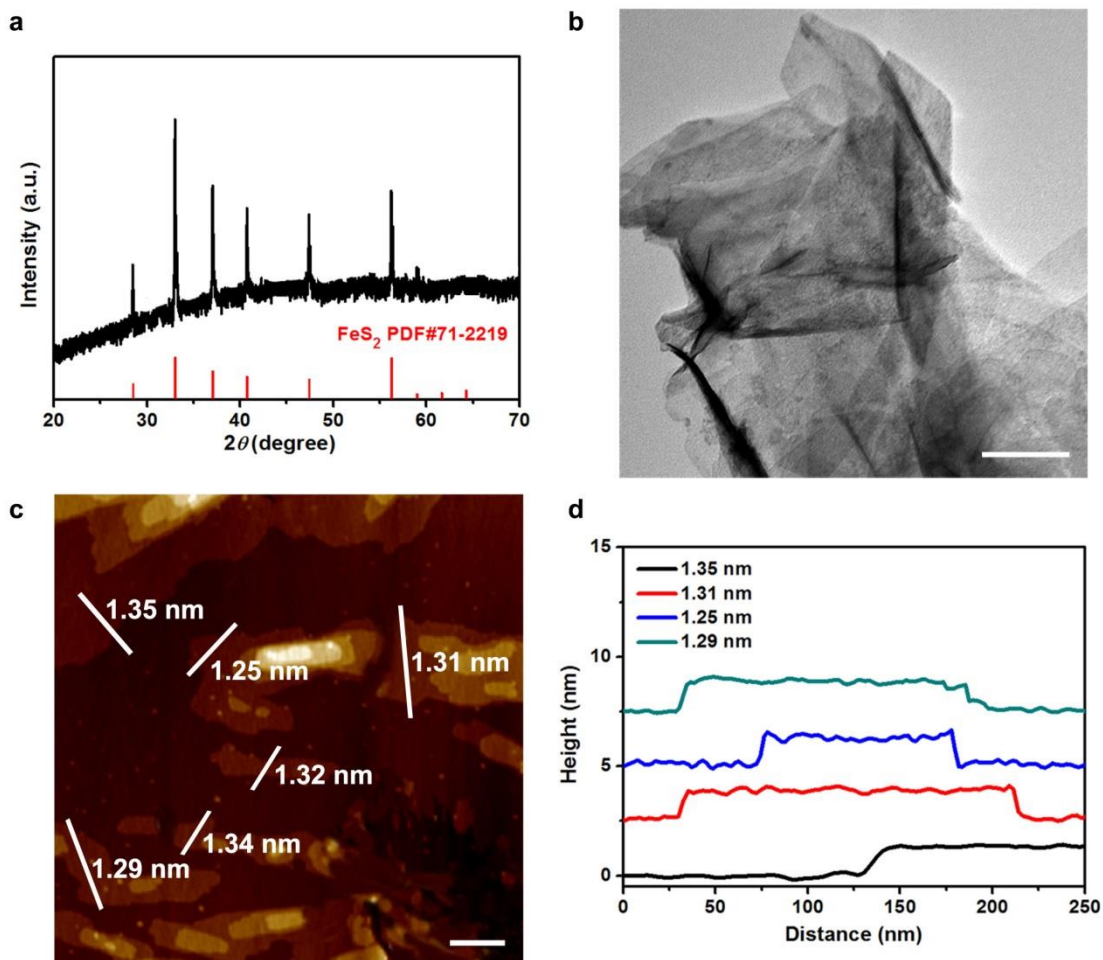

**Supplementary Figure 18 | Characterization of the pure FeS<sub>2</sub> nanosheets.** **a** XRD pattern, in which the standard pattern of FeS<sub>2</sub> is added in red for comparison. **b** TEM image. **c** AFM image, in which the six values are the thickness values measured by the height profiles along the corresponding white lines. **d** Height profiles along four white lines in **c**, which are randomly selected as examples. The six values in **c** give an average of 1.31 nm and a standard deviation of 0.04 nm. Scale bars in **b** and **c** are 100 nm.

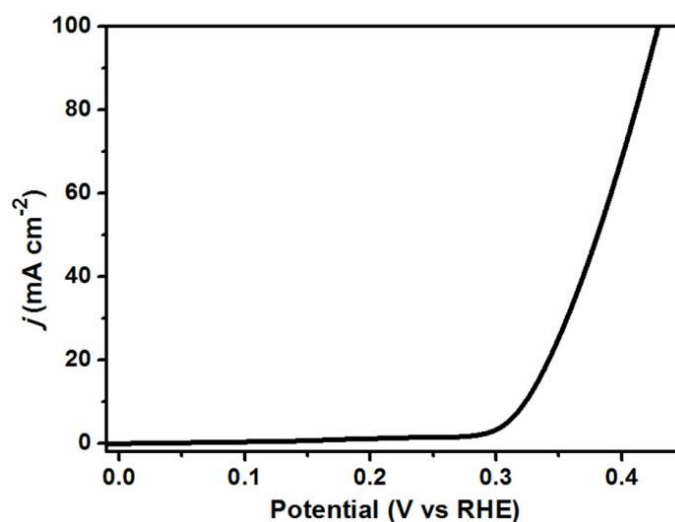

**Supplementary Figure 19 | HzOR polarization curve of the pure FeS<sub>2</sub> nanosheets in 1.0 M KOH with 0.1 M hydrazine.** The conditions to take this curve are the same as those for Fig. 2d. This curve shows that the FeS<sub>2</sub> nanosheets exhibited a potential of 428 mV for delivering the current density of 100 mA cm<sup>-2</sup> (namely  $E_{100} = 428$  mV). This  $E_{100}$  value is significantly larger than those of CoS<sub>2</sub> (205 mV) and Fe-CoS<sub>2</sub> (129 mV), as shown in Fig. 2d. This comparison indicates the inferior HzOR activity of FeS<sub>2</sub>.



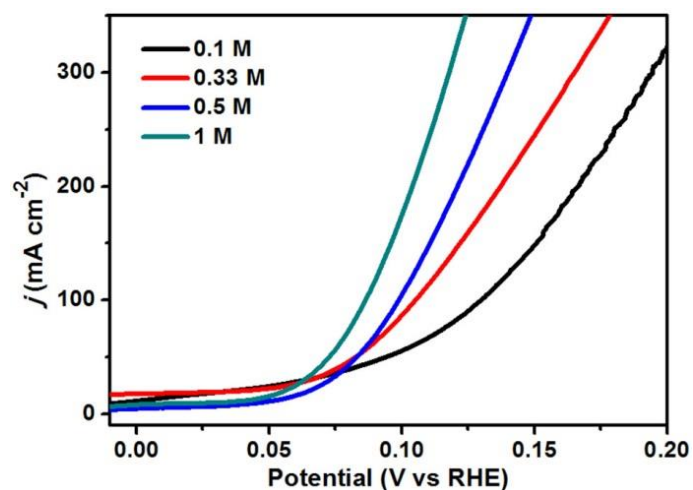

**Supplementary Figure 20 | HzOR polarization curves of the Fe-CoS<sub>2</sub> nanosheets in hydrazine with different concentrations, whose values are labeled in the panel.**

Note that the blue curve in Fig. 2d is redrawn here as the black one. The conditions to measure the HzOR polarization curves here are the same as those for Fig. 2d. For instance, the KOH concentration in the solutions containing hydrazine was always kept at 1.0 M, the same as that for Fig. 2d.

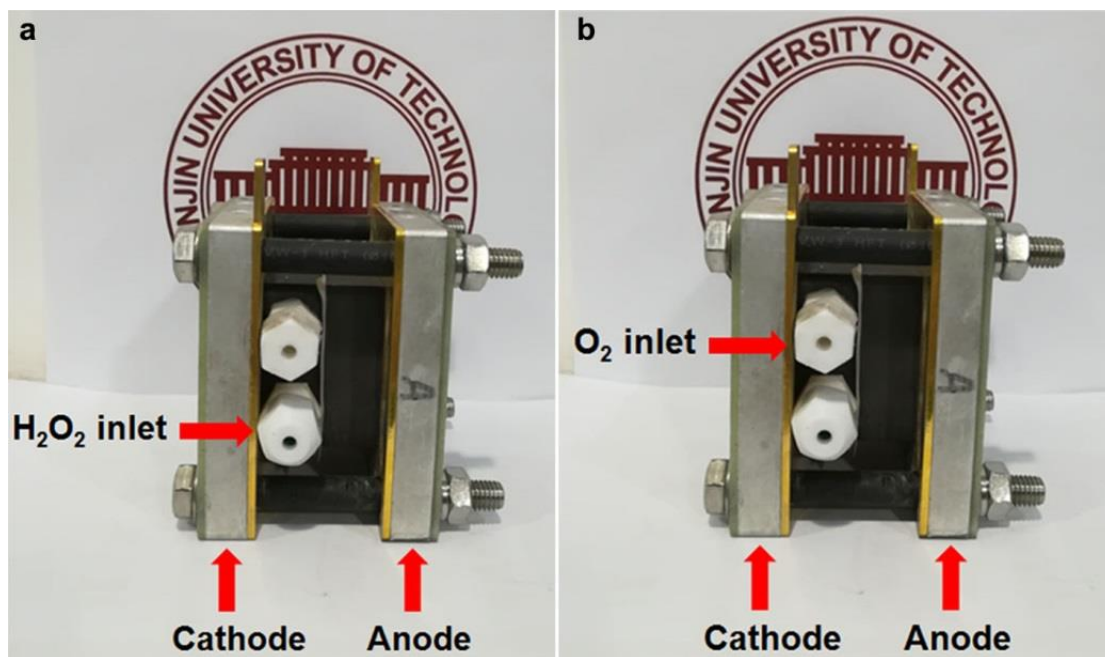

**Supplementary Figure 21 | Optical images of the DHzFCs. a** Optical image of the DHzFC with H<sub>2</sub>O<sub>2</sub> as the oxidizing agent. **b** Optical image of the DHzFC with O<sub>2</sub> as the oxidizing agent.

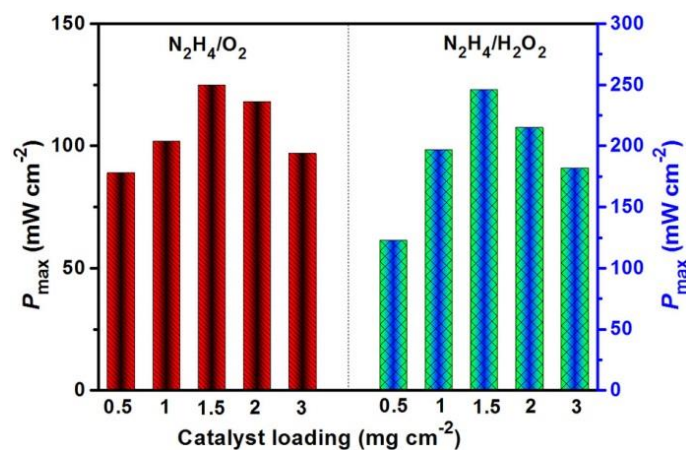

**Supplementary Figure 22 |  $P_{\max}$  of the DHzFCs, whose anode and cathode were the Fe-CoS<sub>2</sub> nanosheets and 40 wt.% Pt/C, respectively, as a function of Fe-CoS<sub>2</sub> loadings.  $P_{\max}$  has the same meaning as that in the main text, which is the maximum power density. The results here indicate that the best Fe-CoS<sub>2</sub> loading corresponding to the highest  $P_{\max}$  value is 1.5 mg cm<sup>-2</sup> for the DHzFCs with O<sub>2</sub> or H<sub>2</sub>O<sub>2</sub> as the oxidizing agent.**

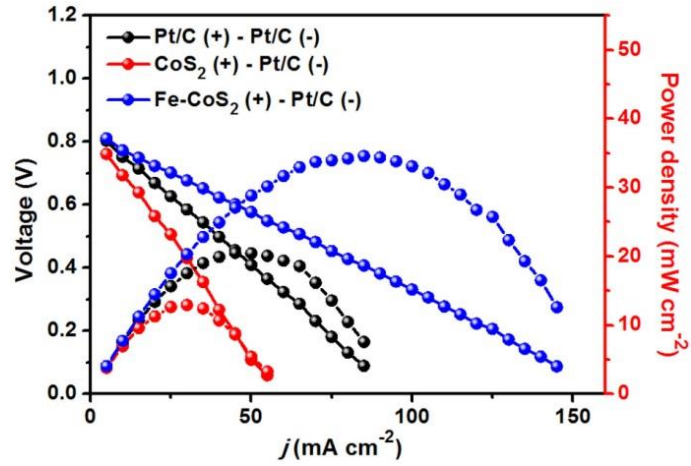

Supplementary Figure 23 | Current density–voltage ( $j$ - $V$ ) and current density–power density ( $j$ - $P$ ) curves of three DHzFCs. The three DHzFCs use the Fe-CoS<sub>2</sub> nanosheets, the CoS<sub>2</sub> nanosheets and 40 wt.% Pt/C as the anodes and 40 wt.% Pt/C as the cathodes, in which the oxidizing agents are all air.

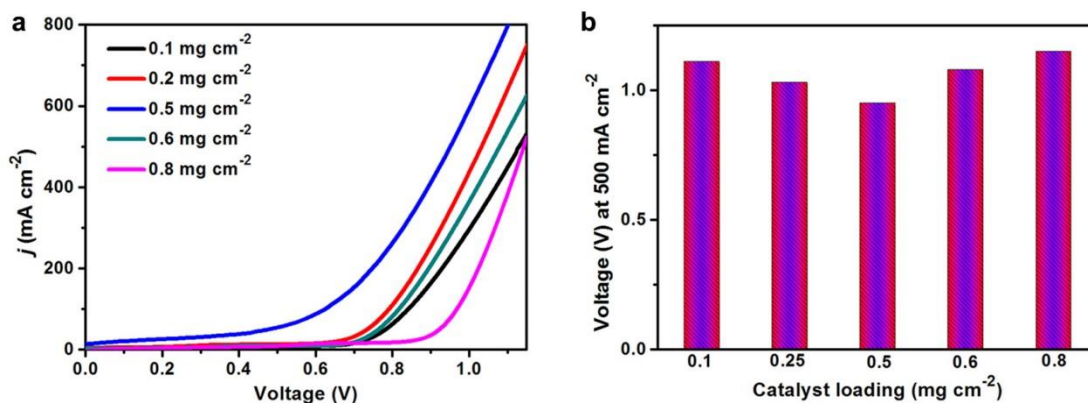

**Supplementary Figure 24 | OH<sub>2</sub>S performances of the Fe-CoS<sub>2</sub> nanosheets with different loadings. a** OH<sub>2</sub>S polarization curves at different loadings. **b** Required cell voltage for 500 mA cm<sup>-2</sup>, corresponding to **a**. Note that the blue curve in Fig. 4a is redrawn here as the blue one in **a**. The results here indicate that the best Fe-CoS<sub>2</sub> loading corresponding to the highest OH<sub>2</sub>S performance (namely the lowest voltage for 500 mA cm<sup>-2</sup>) is 0.5 mg cm<sup>-2</sup>.

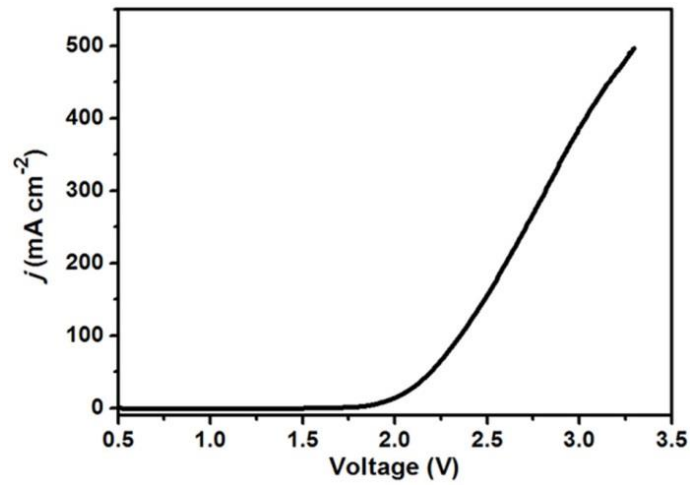

**Supplementary Figure 25 | Polarization curve of the Fe-CoS<sub>2</sub> nanosheets for overall water splitting.** During collecting the curve, the Fe-CoS<sub>2</sub> nanosheets worked bifunctionally for overall water splitting in 1.0 M KOH.

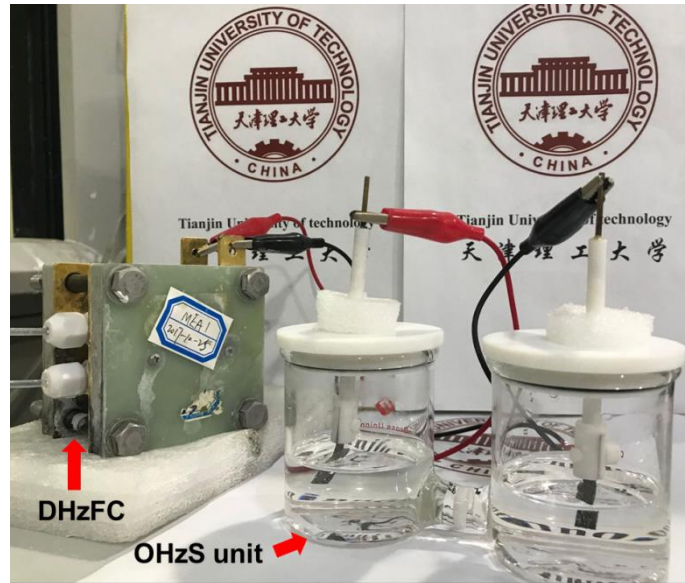

**Supplementary Figure 26 | Optical image of a self-powered H<sub>2</sub> production system.**

This self-powered H<sub>2</sub> production system integrates a DHzFC and an OHzS unit.

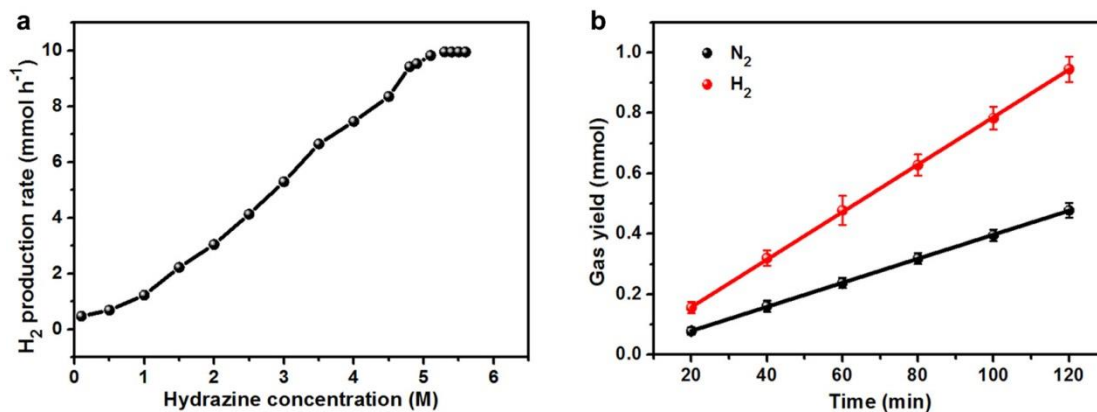

**Supplementary Figure 27 | Performances of the self-powered H<sub>2</sub> production system with the Fe-CoS<sub>2</sub> nanosheets at different hydrazine concentrations at 0.7 V.**

**a** H<sub>2</sub> production rates at different hydrazine concentrations. **b** Generated amounts of H<sub>2</sub> and N<sub>2</sub> in the system with 0.1 M hydrazine, in which the error bars represent the standard deviations of the amounts. The linear relationship in **b** gives the H<sub>2</sub> production rate to be 0.47 mmol h<sup>-1</sup>. The result in **a** shows that when the hydrazine concentration increased from 0.1 to 5.6 M, the H<sub>2</sub> production rate exhibited an initial value of 0.47 mmol h<sup>-1</sup>, then increased and finally became saturated at 5.3–5.6 M. The saturated value is 9.95 mmol h<sup>-1</sup>, corresponding to Fig. 4d.



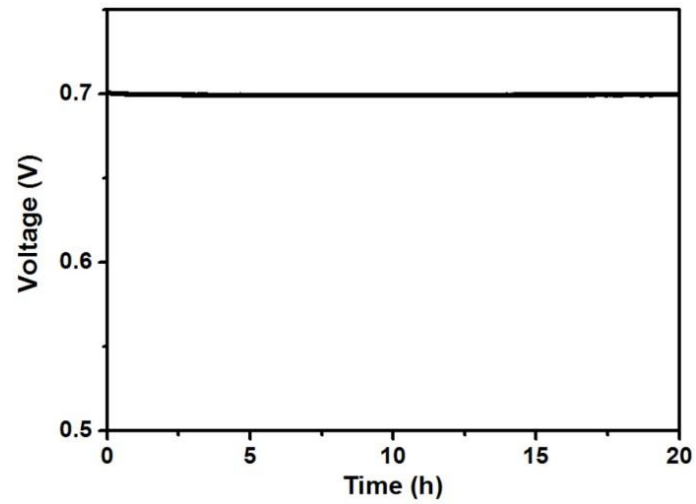

**Supplementary Figure 28 | Voltage–time (V–t) curve of the self-powered H<sub>2</sub> production system.** This self-powered H<sub>2</sub> production system integrates a DHzFC and an OHzS unit.

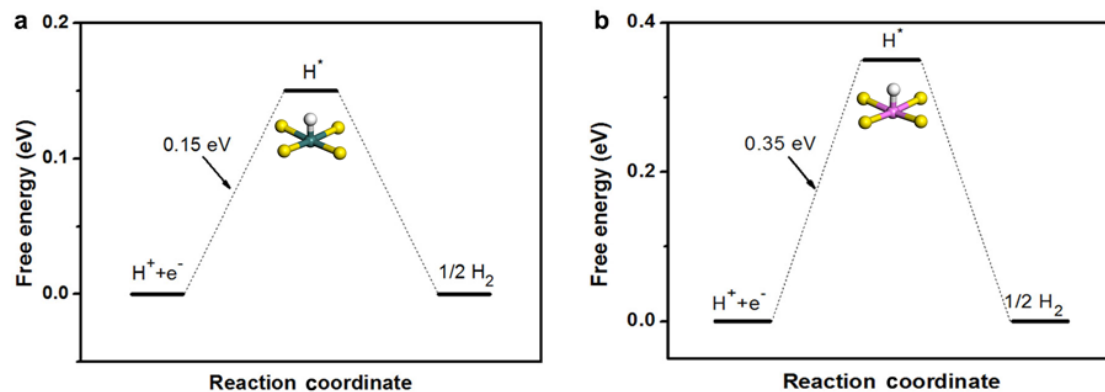

**Supplementary Figure 29 | Calculated free-energy diagrams of HER at 0 V vs RHE. a**

Free-energy diagram of HER on the Co site of the Fe-CoS<sub>2</sub> surface. **b** Free-energy

diagram of HER on the Fe site of the Fe-CoS<sub>2</sub> surface. The insets in **a** and **b** are the

atomic configurations of H\* adsorbed on the Co and the Fe sites, respectively, of the

Fe-CoS<sub>2</sub> surface. The  $\Delta G_{H^*}$  value on the Co site was calculated to be +0.15 eV, smaller

than that on the Fe site (+0.35 eV), suggesting that the atomic configuration of H\*

adsorbed on the Co site is more stable than on the Fe site.

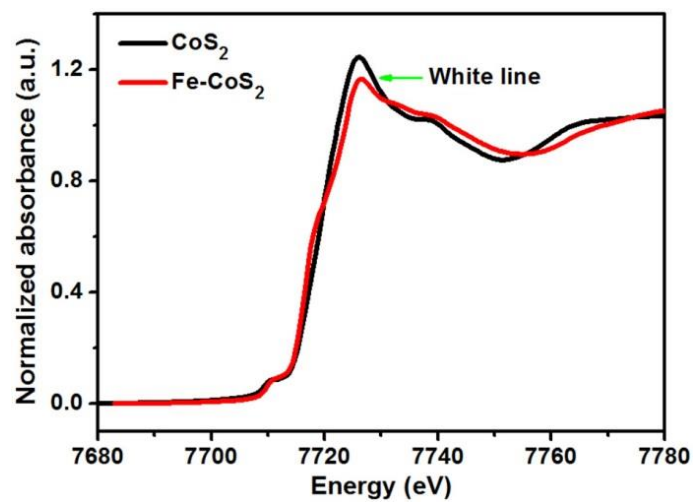

**Supplementary Figure 30 | Co K-edge XANES spectra of the pure  $\text{CoS}_2$  nanosheets and the  $\text{Fe-CoS}_2$  ones.** The white line means the first peak after absorption edge.

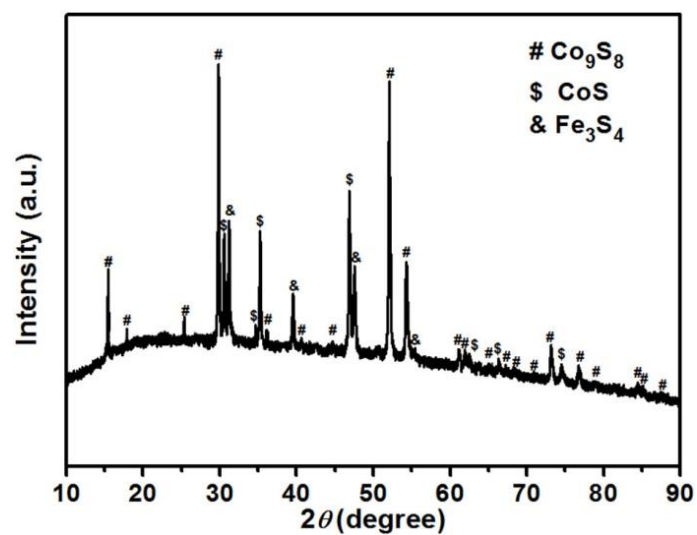

**Supplementary Figure 31 | XRD pattern of the Fe- $\text{CoS}_2$  nanosheets.** These Fe- $\text{CoS}_2$  nanosheets have the Fe doping content of 9.5 at.%.

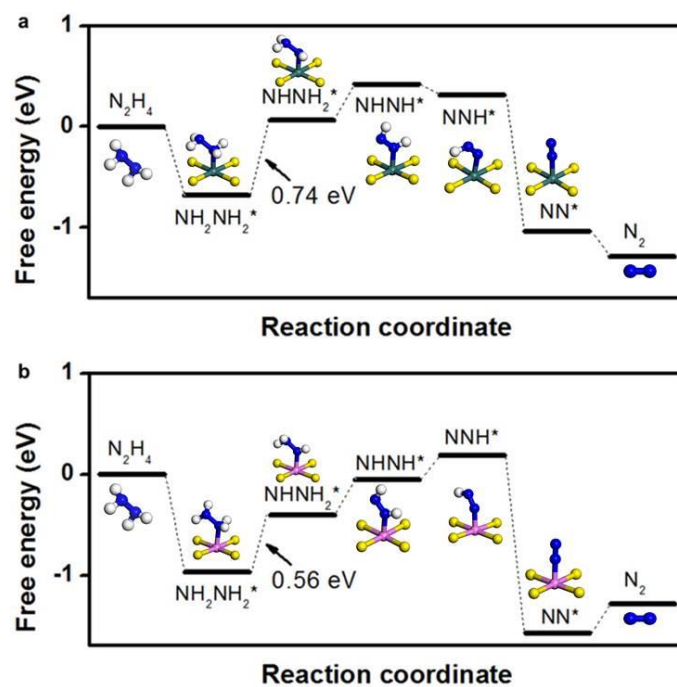

**Supplementary Figure 32 | Calculated free-energy diagrams of HzOR at 0 V vs RHE.**

**a** Free-energy diagram of HzOR on the Co site of the Fe-CoS<sub>2</sub> surface. **b** Free-energy diagram of HzOR on the Fe site of the Fe-CoS<sub>2</sub> surface. The insets in **a** and **b** are the N<sub>2</sub>H<sub>4</sub> and N<sub>2</sub> molecular models and the atomic configurations of the intermediates adsorbed on the Co and the Fe sites, respectively, of the Fe-CoS<sub>2</sub> surface. The  $\Delta G$  value of PDS on the Co site was calculated to be +0.74 eV, larger than that on the Fe site (+0.56 eV), suggesting that the atomic configurations of intermediates on the Fe site are more stable than on the Co site.

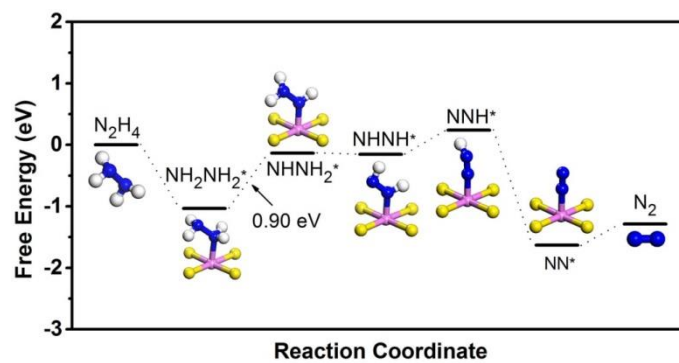

**Supplementary Figure 33 | Free energy diagram of HzOR on the FeS<sub>2</sub> surface at 0 V vs RHE.** The insets are the N<sub>2</sub>H<sub>4</sub> and N<sub>2</sub> molecular models and the most stable configurations of the intermediates adsorbed on the FeS<sub>2</sub> surface.

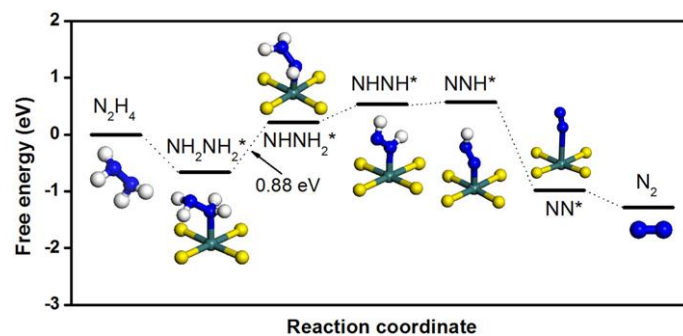

**Supplementary Figure 34 | Free energy diagram of HzOR on the CoS<sub>2</sub> surface at 0 V vs RHE.** The insets are the N<sub>2</sub>H<sub>4</sub> and N<sub>2</sub> molecular models and the most stable configurations of the intermediates adsorbed on the CoS<sub>2</sub> surface.

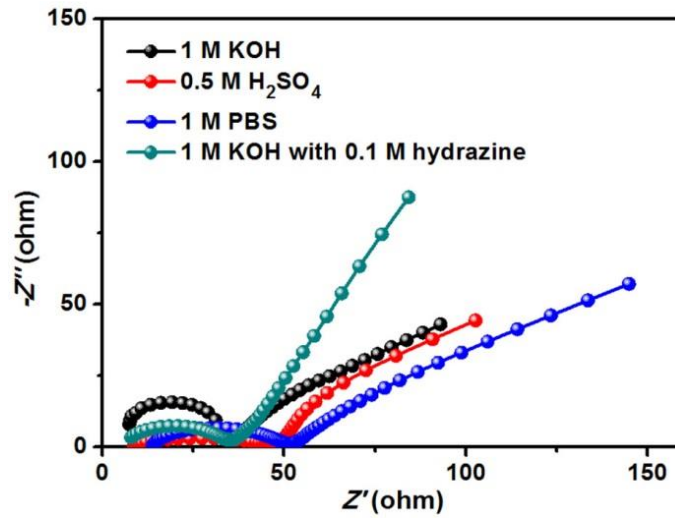

**Supplementary Figure 35 | EIS plots recorded in different electrolytes by using the Fe-CoS<sub>2</sub> nanosheets at an open-circuit potential.** The EIS spectra give the solution resistances to be 7.4 Ω (1.0 M KOH), 9.0 Ω (0.5 M H<sub>2</sub>SO<sub>4</sub>), 13.9 Ω (1.0 M PBS) and 7.9 Ω (1.0 M KOH with 0.1 M hydrazine), respectively.



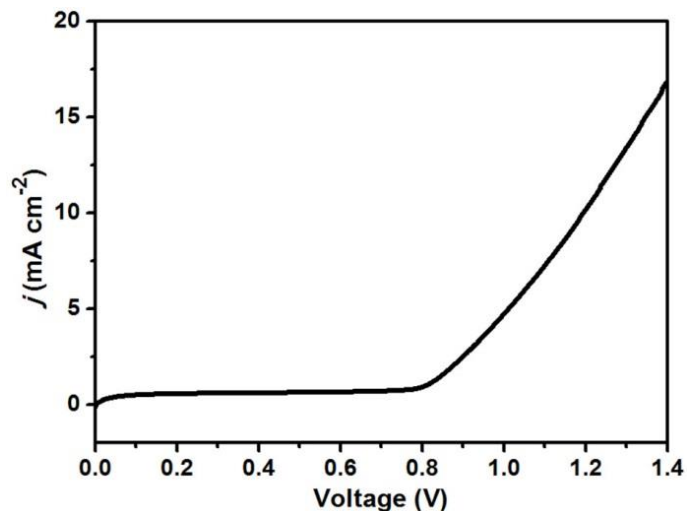

**Supplementary Figure 36 | OHzS polarization curve of the Ni foams in 1.0 M KOH with 0.1 M hydrazine.** This curve shows that the Ni foams required a cell voltage of 1.20 V to achieve the OHzS current density of  $10 \text{ mA cm}^{-2}$ . This cell voltage is much higher than that of Fe-CoS<sub>2</sub> (0.002 V) for  $10 \text{ mA cm}^{-2}$ , which is shown in Fig. 4a. Moreover, when the cell voltage was 0.002 V, the current density of the Ni foams was  $-0.01 \text{ mA cm}^{-2}$ , far lower than that of Fe-CoS<sub>2</sub> ( $10 \text{ mA cm}^{-2}$ ). That is, if we use the  $10 \text{ mA cm}^{-2}$  of Fe-CoS<sub>2</sub> as a reference, the  $-0.01 \text{ mA cm}^{-2}$  of the Ni foams is very close to zero. Besides, the negative sign of the  $-0.01 \text{ mA cm}^{-2}$  indicates that the OHzS did not occur at that moment. Therefore, Ni foams gave a negligible contribution to the observed OHzS activity of Fe-CoS<sub>2</sub> on Ni foams.

Supplementary Table 1 | HER catalytic performances in our work and the literature.

| Catalyst                  | Electrolyte                          | $\eta_{10}$ (mV) | Durability   | Reference                                         |
|---------------------------|--------------------------------------|------------------|--------------|---------------------------------------------------|
| MoC <sub>x</sub>          | 0.5 M H <sub>2</sub> SO <sub>4</sub> | 142              | 11 h         | <i>Nat. Commun.</i> <b>2015</b> , 6, 6512         |
|                           | 1.0 M KOH                            | 151              | 11 h         |                                                   |
| Mo <sub>x</sub> C-Ni@NCV  | 0.5 M H <sub>2</sub> SO <sub>4</sub> | 68               | 50,000 s     | <i>J. Am. Chem. Soc.</i> <b>2015</b> , 137, 15753 |
|                           | 1.0 M KOH                            | 126              | 10,000 s     |                                                   |
| CoP                       | 0.5 M H <sub>2</sub> SO <sub>4</sub> | 65               | 5,000 cycles | <i>J. Am. Chem. Soc.</i> <b>2014</b> , 136, 7587  |
|                           | 1.0 M PBS                            | 106              | 1,000 cycles |                                                   |
|                           | 1.0 M KOH                            | 209              | 1,000 cycles |                                                   |
| CoS <sub>2</sub> @NSC/CFP | 0.5 M H <sub>2</sub> SO <sub>4</sub> | 95               | 1,000 cycles | <i>ChemCatChem</i> <b>2017</b> , 10, 796          |

|                                                       |                                      |     |               |                                                     |
|-------------------------------------------------------|--------------------------------------|-----|---------------|-----------------------------------------------------|
| <b>MoS<sub>2</sub>/CoS<sub>2</sub></b>                | 0.5 M H <sub>2</sub> SO <sub>4</sub> | 87  | 1,000 cycles  | <i>J. Mater. Chem. A</i> <b>2015</b> , 3, 22886     |
| <b>CoS<sub>2</sub>/P</b>                              | 0.5 M H <sub>2</sub> SO <sub>4</sub> | 67  | 3,000 cycles  | <i>Chem. Commun.</i> <b>2015</b> , 51, 14160        |
| <b>CoS<sub>2</sub></b>                                | 0.5 M H <sub>2</sub> SO <sub>4</sub> | 107 | 3,000 cycles  | <i>Green Energy Environ.</i> <b>2017</b> , 2, 134   |
| <b>CoS<sub>2</sub>/RGO-CNT</b>                        | 0.5 M H <sub>2</sub> SO <sub>4</sub> | 142 | 500 cycles    | <i>Angew. Chem.</i> <b>2014</b> , 126, 12802        |
| <b>CoS<sub>2</sub> NW</b>                             | 0.5 M H <sub>2</sub> SO <sub>4</sub> | 145 | 41 h          | <i>J. Am. Chem. Soc.</i> <b>2014</b> , 136, 10053   |
| <b>N<sub>5</sub>-V<sub>5</sub>-CoS<sub>2</sub></b>    | 0.5 M H <sub>2</sub> SO <sub>4</sub> | 57  | 10,000 cycles | <i>ACS Energy Lett.</i> <b>2017</b> , 2, 1022       |
| <b>CoS<sub>2</sub> pyramids</b>                       | 1.0 M KOH                            | 244 | 30,000 s      | <i>Electrochimica Acta</i> <b>2014</b> , 148, 170   |
| <b>CoS<sub>2</sub> NA/Ti</b>                          | 1.0 M KOH + 0.3 M Urea               | 140 | 15,000 cycles | <i>Electrochimica Acta</i> <b>2017</b> , 246, 776   |
| <b>Ni(OH)<sub>2</sub>-CoS<sub>2</sub></b>             | 1.0 M KOH                            | 99  | 30 h          | <i>Nanoscale</i> <b>2017</b> , 9, 16632             |
| <b>Ni<sub>5</sub>P<sub>4</sub>-Ni<sub>2</sub>P-NS</b> | 0.5 M H <sub>2</sub> SO <sub>4</sub> | 120 | 72 h          | <i>Angew. Chem. Int. Ed.</i> <b>2015</b> , 54, 8188 |
| <b>NiSe/NF</b>                                        | 1.0 M KOH                            | 96  | 12 h          | <i>Angew. Chem. Int. Ed.</i> <b>2015</b> , 54, 9351 |

|                                         |                                      |                              |               |                                                    |
|-----------------------------------------|--------------------------------------|------------------------------|---------------|----------------------------------------------------|
| <b>Ni<sub>3</sub>S<sub>2</sub>/NF</b>   | neutral media                        | 170                          | 200 h         | <i>J. Am. Chem. Soc.</i> <b>2015</b> , 137, 14023  |
| <b>p-1T-MoS<sub>2</sub></b>             | 0.5 M H <sub>2</sub> SO <sub>4</sub> | 153                          | 20,000 s      | <i>J. Am. Chem. Soc.</i> <b>2016</b> , 138, 7965   |
| <b>α-iron-nickel sulfide</b>            | 0.5 M H <sub>2</sub> SO <sub>4</sub> | 105                          | 40 h          | <i>J. Am. Chem. Soc.</i> <b>2015</b> , 137, 11900  |
| <b>CoMoP@C</b>                          | 0.5 M H <sub>2</sub> SO <sub>4</sub> | 41                           | 10,000 cycles | <i>Energy Environ. Sci.</i> <b>2017</b> , 10, 788  |
|                                         | alkaline electrolyte                 | 81                           |               |                                                    |
|                                         | neutral electrolyte                  | 526 @ 50 mA cm <sup>-2</sup> | 24 h          |                                                    |
| <b>NiCo<sub>2</sub>P<sub>x</sub>/CF</b> | 0.5 M H <sub>2</sub> SO <sub>4</sub> | 104                          | 5,000 cycles  | <i>Adv. Mater.</i> <b>2017</b> , 29, 1605502       |
|                                         | 1.0 M KOH                            | 58                           |               |                                                    |
|                                         | 1.0 M PBS                            | 63                           | 30 h          |                                                    |
| <b>CoP@BCN-1</b>                        | 0.5 M H <sub>2</sub> SO <sub>4</sub> | 87                           | 2,000 cycles  | <i>Adv. Energy Mater.</i> <b>2017</b> , 7, 1601671 |
|                                         | 1.0 M KOH                            | 215                          |               |                                                    |
|                                         | 1.0 M PBS                            | 122                          |               |                                                    |

|                                           |                                      |                             |               |                                                    |
|-------------------------------------------|--------------------------------------|-----------------------------|---------------|----------------------------------------------------|
| <b>Co/CoP<sub>x</sub></b>                 | 0.5 M H <sub>2</sub> SO <sub>4</sub> | 178                         | 12 h          | <i>Adv. Energy Mater.</i> <b>2017</b> , 7, 1602355 |
|                                           | 1.0 M KOH                            | 253                         |               |                                                    |
|                                           | 1.0 M PBS                            | 138                         |               |                                                    |
| <b>HNDCM-Co/CoP</b>                       | 0.5 M H <sub>2</sub> SO <sub>4</sub> | 135                         | 20 h          | <i>ACS Nano</i> <b>2017</b> , 11, 4358             |
|                                           | 1.0 M KOH                            | 138                         |               |                                                    |
| <b>Ru@C<sub>2</sub>N</b>                  | 0.5 M H <sub>2</sub> SO <sub>4</sub> | 22                          | 10,000 cycles | <i>Nat. Nanotech.</i> <b>2017</b> , 12, 441        |
|                                           | 1.0 M KOH                            | 17                          |               |                                                    |
| <b>Ni<sub>5</sub>P<sub>4</sub> pellet</b> | 1.0 M H <sub>2</sub> SO <sub>4</sub> | 23                          | 16 h          | <i>Energy Environ. Sci.</i> <b>2015</b> , 8, 1027  |
|                                           | 1.0 M NaOH                           | 49                          |               |                                                    |
| <b>ONPPGC/OCC</b>                         | 0.5 M H <sub>2</sub> SO <sub>4</sub> | 386                         | 10 h          | <i>Energy Environ. Sci.</i> <b>2016</b> , 9, 1210  |
|                                           | 1.0 M KOH                            | 446                         |               |                                                    |
|                                           | 0.2 M PBS                            | 352 @ 1 mA cm <sup>-2</sup> |               |                                                    |

|                                      |                                      |      |               |                                                           |
|--------------------------------------|--------------------------------------|------|---------------|-----------------------------------------------------------|
| <b>Ni-C-N NSs</b>                    | 0.5 M H <sub>2</sub> SO <sub>4</sub> | 60.9 | 70 h          | <i>J. Am. Chem. Soc.</i> <b>2016</b> , <i>138</i> , 14546 |
|                                      | 1.0 M KOH                            | 30.8 | 70 h          |                                                           |
|                                      | 1.0 M PBS                            | 92.1 | 70 h          |                                                           |
| <b>Pt/C</b>                          | 0.5 M H <sub>2</sub> SO <sub>4</sub> | 11   | -             | <i>This work</i>                                          |
|                                      | 1.0 M KOH                            | 23   |               |                                                           |
|                                      | 1.0 M PBS                            | 44   |               |                                                           |
| <b>Fe-CoS<sub>2</sub> nanosheets</b> | 0.5 M H <sub>2</sub> SO <sub>4</sub> | 31   | 10,000 cycles |                                                           |
|                                      | 1.0 M KOH                            | 40   | 40 h          |                                                           |
|                                      | 1.0 M PBS                            | 49   |               |                                                           |

$\eta_{10}$  is  $\eta$  at 10 mA cm<sup>-2</sup> except those specified else.

Supplementary Table 2 | TOF values in the HER performances of our work and the literature.

| Catalyst            | Electrolyte                          | TOF (s <sup>-1</sup> ) at $\eta = 100$ mV | TOF (s <sup>-1</sup> ) at $\eta = 200$ mV | Reference                                                   |
|---------------------|--------------------------------------|-------------------------------------------|-------------------------------------------|-------------------------------------------------------------|
| Ni-C-N NSs          | 0.5 M H <sub>2</sub> SO <sub>4</sub> | 0.44                                      | 6.67                                      | <i>J. Am. Chem. Soc.</i> <b>2016</b> , <i>138</i> , 14546   |
|                     | 1.0 M PBS                            | 0.29                                      | 0.95                                      |                                                             |
|                     | 1.0 M KOH                            | 1.95                                      | 8.52                                      |                                                             |
| CoN <sub>x</sub> /C | 0.5 M H <sub>2</sub> SO <sub>4</sub> | 0.39                                      | 6.5                                       | <i>Nat. Commun.</i> <b>2015</b> , <i>6</i> , 7992           |
| Ni <sub>2</sub> P   | 0.5 M H <sub>2</sub> SO <sub>4</sub> | 0.015                                     | 0.5                                       | <i>J. Am. Chem. Soc.</i> <b>2013</b> , <i>135</i> , 9267    |
| CoP                 | 0.5 M H <sub>2</sub> SO <sub>4</sub> | 0.046                                     | -                                         | <i>Angew. Chem. Int. Ed.</i> <b>2014</b> , <i>53</i> , 5427 |
| Ni-Mo               | 2.0 M KOH                            | 0.05                                      | 0.36                                      | <i>ACS Catal.</i> <b>2013</b> , <i>3</i> , 166              |
| FeP/Ti              | 0.5 M H <sub>2</sub> SO <sub>4</sub> | 0.277                                     | -                                         | <i>ACS Nano</i> <b>2014</b> , <i>8</i> , 11101              |
| FeS <sub>2</sub>    | 0.1 M PBS                            | 0.04 (140 mV)                             | -                                         | <i>ACS Catal.</i> <b>2015</b> , <i>5</i> , 6653             |

|                                          |                                      |               |                 |                                                           |
|------------------------------------------|--------------------------------------|---------------|-----------------|-----------------------------------------------------------|
| <b>N-MoS<sub>2</sub>-3</b>               | 0.5 M H <sub>2</sub> SO <sub>4</sub> | 4             | -               | <i>Adv. Energy Mater.</i> <b>2017</b> , 7, 1602086        |
| <b>Ni-MoS<sub>2</sub></b>                | 0.5 M H <sub>2</sub> SO <sub>4</sub> | 30.9 (650 mV) | 60.3 (740 mV)   | <i>ACS Catal.</i> <b>2016</b> , 6, 6008                   |
| <b>p-1T-MoS<sub>2</sub></b>              | 0.5 M H <sub>2</sub> SO <sub>4</sub> | 0.5 (153 mV)  | -               | <i>J. Am. Chem. Soc.</i> <b>2016</b> , 138, 7965          |
| <b>Irradiated Au-MoS<sub>2</sub></b>     | 0.5 M H <sub>2</sub> SO <sub>4</sub> | 8.76 (300 mV) | -               | <i>J. Am. Chem. Soc.</i> <b>2015</b> , 137, 7365          |
| <b>CoS</b>                               | 0.5 M H <sub>2</sub> SO <sub>4</sub> | 0.39          | -               | <i>J. Mater. Chem. A</i> <b>2015</b> , 3, 13066           |
| <b>MoS<sub>2</sub></b>                   | 0.5 M H <sub>2</sub> SO <sub>4</sub> | -             | 0.725 (300 mV)  | <i>Adv. Mater.</i> <b>2013</b> , 25, 5807                 |
| <b>NiCoP/rGO</b>                         | 0.5 M H <sub>2</sub> SO <sub>4</sub> | 1.70          | -               | <i>Adv. Funct. Mater.</i> <b>2016</b> , 26, 6785          |
| <b>NiCoP/NF</b>                          | 1.0 M KOH                            | 8.93          | 3.88 (300 mV)   | <i>Nano Lett.</i> <b>2016</b> , 16, 7718                  |
| <b>Ni<sub>2</sub>P/Ni/NF</b>             | 1.0 M KOH                            | -             | 0.015 (350 mV)  | <i>ACS Catal.</i> <b>2016</b> , 6, 714                    |
| <b>1D-RuO<sub>2</sub>-CN<sub>x</sub></b> | 0.5 M H <sub>2</sub> SO <sub>4</sub> | -             | 0.0961 (350 mV) | <i>ACS Appl. Mater. Interfaces</i> <b>2016</b> , 8, 28678 |
| <b>NiWS<sub>x</sub></b>                  | neutral solution                     | -             | 0.12 (275 mV)   | <i>Energy Environ Sci.</i> <b>2013</b> , 6, 2452          |



|                                           |                                      |               |               |                                                   |
|-------------------------------------------|--------------------------------------|---------------|---------------|---------------------------------------------------|
| <b>Ni-MoS<sub>2</sub></b>                 | 1 M KOH                              | -             | 0.32 (150 mV) | <i>Energy Environ Sci.</i> <b>2016</b> , 9, 2789  |
| <b>Ni<sub>5</sub>P<sub>4</sub> pellet</b> | 1.0 M H <sub>2</sub> SO <sub>4</sub> | 3.5           | 9.8           | <i>Energy Environ. Sci.</i> <b>2015</b> , 8, 1027 |
|                                           | 1.0 M KOH                            | 0.79          | 2.9           |                                                   |
| <b>NiCo<sub>2</sub>P<sub>x</sub>/CF</b>   | 0.5 M H <sub>2</sub> SO <sub>4</sub> | 0.021         | -             | <i>Adv. Mater.</i> <b>2017</b> , 29, 1605502      |
|                                           | 1.0 M KOH                            | 0.056         |               |                                                   |
|                                           | 1.0 M PBS                            | 0.055         |               |                                                   |
| <b>CoS<sub>2</sub> nanosheets</b>         | 0.5 M H <sub>2</sub> SO <sub>4</sub> | 0.26 (400 mV) | 1.34 (500 mV) | <i>This work</i>                                  |
|                                           | 1.0 M KOH                            | 0.23 (400 mV) | 1.12 (500 mV) |                                                   |
|                                           | 1.0 M PBS                            | 0.16 (400 mV) | 0.69 (500 mV) |                                                   |
| <b>Fe-CoS<sub>2</sub> nanosheets</b>      | 0.5 M H <sub>2</sub> SO <sub>4</sub> | 4.76          | 15.14         |                                                   |
|                                           | 1.0 M KOH                            | 6.74          | 20.35         |                                                   |
|                                           | 1.0 M PBS                            | 2.21          | 7.34          |                                                   |

Supplementary Table 3 | HzOR catalytic performances in our work and the literature.

| Catalyst         | Electrolyte                                                                                                                     | $E_{100}$ (V vs RHE) | Durability   | Reference                                              |
|------------------|---------------------------------------------------------------------------------------------------------------------------------|----------------------|--------------|--------------------------------------------------------|
| FePc             | 0.2 M KOH + (-) N <sub>2</sub> H <sub>4</sub>                                                                                   | ~ 0.35               | 5,000 cycles | <i>Talanta</i> <b>2005</b> , 67, 162                   |
| NiHCF            | 0.1 M NaNO <sub>3</sub> + (-) N <sub>2</sub> H <sub>4</sub>                                                                     | 0.5                  | 100 cycles   | <i>J. Electroanal. Chem.</i> <b>2008</b> , 617, 111    |
| PEDOP            | 3.0 M NaCl + (-) N <sub>2</sub> H <sub>4</sub>                                                                                  | - <sup>a</sup>       | 240,000 s    | <i>Sens. Actuators B: Chem.</i> <b>2011</b> , 153, 246 |
| Pd/CNTs          | 0.01 M N <sub>2</sub> H <sub>4</sub> SO <sub>4</sub> + 0.1 M K <sub>2</sub> SO <sub>4</sub> + (-) N <sub>2</sub> H <sub>4</sub> | ~ 0.1                | 1,800 s      | <i>Electrochem. Commun.</i> <b>2009</b> , 11, 504      |
| PANI-Ag          | 0.5 M HCl + 5×10 <sup>-4</sup> M N <sub>2</sub> H <sub>4</sub>                                                                  | ~ 1                  | -            | <i>Colloid. Surf. A</i> <b>2011</b> , 377, 28          |
| Cu nanoparticles | 0.1 M KOH + 0.01 M N <sub>2</sub> H <sub>4</sub>                                                                                | ~ 0.5                | 100 cycles   | <i>J. Mater. Chem. A</i> <b>2014</b> , 2, 4580         |
| SiAl/SiPy/FeTsP  | 0.5 M KCl + 2×10 <sup>-3</sup> M N <sub>2</sub> H <sub>4</sub>                                                                  | ~ 0.4                | 100 cycles   | <i>Electroanalysis</i> <b>2005</b> , 17, 9             |

|                        |                                                                                                      |         |           |                                                            |
|------------------------|------------------------------------------------------------------------------------------------------|---------|-----------|------------------------------------------------------------|
| <b>CoHCF(Au)</b>       | 0.1 M KNO <sub>3</sub> + 2.5×10 <sup>-4</sup> M N <sub>2</sub> H <sub>4</sub>                        | ~ 0.7   | -         | <i>Electrochim. Acta</i> <b>2014</b> , 139, 88             |
| <b>CoHCF</b>           | 0.5 M NaCl + 5×10 <sup>-4</sup> M N <sub>2</sub> H <sub>4</sub>                                      | -       | 15 cycles | <i>J. Solid State. Electrochem.</i> <b>1998</b> , 2, 30    |
| <b>PPy/LS</b>          | PBS + 5×10 <sup>-4</sup> M N <sub>2</sub> H <sub>4</sub>                                             | -       | 1,200 s   | <i>J. Electroanal. Chem.</i> <b>2016</b> , 9, 3143         |
| <b>n-Ag/POT</b>        | 0.1 M NaOH + 0.02 M N <sub>2</sub> H <sub>4</sub>                                                    | -       | 400,000 s | <i>J. Solid State. Electrochem.</i> <b>2015</b> , 19, 2235 |
| <b>3D PNNF</b>         | 3.0 M KOH + 0.5 M N <sub>2</sub> H <sub>4</sub>                                                      | ~ 0.125 | 12,000 s  | <i>Nano. Res.</i> <b>2015</b> , 8, 3365                    |
| <b>Pd-NWNWs</b>        | 0.1 M HClO <sub>4</sub> + (-) N <sub>2</sub> H <sub>4</sub>                                          | ~ 0.35  | 6,000 s   | <i>Electrochim. Acta</i> <b>2015</b> , 176, 125            |
| <b>FeN<sub>4</sub></b> | 0.2 M NaOH + (-) N <sub>2</sub> H <sub>4</sub>                                                       | ~ 0.4   | -         | <i>Electrochem. Commun.</i> <b>2013</b> , 30, 34           |
| <b>AuCu NPs</b>        | 0.1 M PBS + 3×10 <sup>-4</sup> M N <sub>2</sub> H <sub>4</sub>                                       | ~ 0.2   | -         | <i>Electroanalysis</i> <b>2012</b> , 24, 2380              |
| <b>Ru(HCF)</b>         | Britton–Robinson aqueous buffer solution (pH=1.8) + 10 <sup>-3</sup> M N <sub>2</sub> H <sub>4</sub> | ~ 0.96  | -         | <i>J. Appl. Electrochem.</i> <b>2010</b> , 40, 375         |

|                                              |                                                                                  |                                   |          |                                                    |
|----------------------------------------------|----------------------------------------------------------------------------------|-----------------------------------|----------|----------------------------------------------------|
| <b>Ni<sub>2</sub>P/NF</b>                    | 1.0 M KOH + 0.5 M N <sub>2</sub> H <sub>4</sub>                                  | - 0.025 (50 mA cm <sup>-2</sup> ) | 10 h     | <i>Angew. Chem. Int. Ed.</i> <b>2017</b> , 56, 842 |
| <b>Ni<sub>0.6</sub>Co<sub>0.4</sub>-ANSA</b> | 3.0 M KOH + 0.5 M N <sub>2</sub> H <sub>4</sub>                                  | ~- 1 (V vs SCE)                   | 10,000 s | <i>Adv. Sci.</i> <b>2017</b> , 4, 1600179          |
| <b>Cu film</b>                               | 3.0 M KOH + 1.0 M N <sub>2</sub> H <sub>4</sub>                                  | ~- 0.65 (V vs SCE)                | 5,000 s  | <i>Adv. Mater.</i> <b>2015</b> , 27, 2361          |
| <b>Pt (111)</b>                              | 0.1 M HClO <sub>4</sub> + 0.001 M NaCl<br>+ 0.01 M N <sub>2</sub> H <sub>4</sub> | ~ 0.45                            | -        | <i>ChemElectroChem</i> <b>2017</b> , 4, 1130       |
| <b>Pt/C</b>                                  | 1.0 M KOH + 0.1 M N <sub>2</sub> H <sub>4</sub>                                  | 0.170                             | -        | <i>This work</i>                                   |
| <b>CoS<sub>2</sub> nanosheets</b>            |                                                                                  | 0.205                             | -        |                                                    |
| <b>Fe-CoS<sub>2</sub> nanosheets</b>         |                                                                                  | 0.129                             | 40 h     |                                                    |

$E_{100}$  is  $E$  at 100 mA cm<sup>-2</sup> except those specified else.

<sup>a</sup> All of "-" mean that no values were reported for the corresponding parameters in the corresponding references.

Supplementary Table 4 | DHzFC performances in our work and the literature.

| Catalyst                                  | Anodic fuel                                       | $P_{\max}$ (mW cm <sup>-2</sup> ) | OCV (V)                                                              | Reference                                              |
|-------------------------------------------|---------------------------------------------------|-----------------------------------|----------------------------------------------------------------------|--------------------------------------------------------|
| Vap-PM-CNF                                | 4.0 M KOH + 4.0 M N <sub>2</sub> H <sub>4</sub>   | 127.5 (60 °C)                     | ~ 0.92 (N <sub>2</sub> H <sub>4</sub> /O <sub>2</sub> )              | <i>Angew. Chem. Int. Ed.</i> <b>2017</b> , 56, 13513   |
| Co                                        | 1.0 M KOH + 0.67 M N <sub>2</sub> H <sub>4</sub>  | -                                 | ~0.97 (N <sub>2</sub> H <sub>4</sub> /O <sub>2</sub> )               | <i>Angew. Chem. Int. Ed.</i> <b>2007</b> , 46, 8024    |
| Ni <sub>0.6</sub> Co <sub>0.4</sub> -ANSA | 4.0 M KOH + 20 wt.% N <sub>2</sub> H <sub>4</sub> | 107.1 (85 °C)                     | 1.78 (N <sub>2</sub> H <sub>4</sub> /H <sub>2</sub> O <sub>2</sub> ) | <i>Adv. Sci.</i> <b>2017</b> , 4, 1600179              |
| Co@Au/C                                   | 2.0 M NaOH + 2.0 M N <sub>2</sub> H <sub>4</sub>  | 122.8 (60 °C)                     | 1.79 (N <sub>2</sub> H <sub>4</sub> /H <sub>2</sub> O <sub>2</sub> ) | <i>Int. J. Hydrogen Energy</i> <b>2017</b> , 42, 15623 |
| Pd-Ni/C                                   | 1.0 M KOH + 2.0 M N <sub>2</sub> H <sub>4</sub>   | ~160 (60 °C)                      | - (N <sub>2</sub> H <sub>4</sub> /O <sub>2</sub> )                   | <i>J. Power. Sources</i> <b>2011</b> , 196, 956        |
| CoN <sub>x</sub> /C                       | 1.0 M NaOH + 4.0 M N <sub>2</sub> H <sub>4</sub>  | 110 (70 °C)                       | ~0.94 (N <sub>2</sub> H <sub>4</sub> /O <sub>2</sub> )               | <i>J. Mater. Chem.</i> <b>2010</b> , 20, 8139          |

|                                      |                                                    |               |                                                                      |                                                         |
|--------------------------------------|----------------------------------------------------|---------------|----------------------------------------------------------------------|---------------------------------------------------------|
| <b>Zr-Ni alloy</b>                   | 4.0 M NaOH + 2.0 M N <sub>2</sub> H <sub>4</sub>   | 84 (25 °C)    | ~0.9 (N <sub>2</sub> H <sub>4</sub> /O <sub>2</sub> )                | <i>J. Power. Sources</i> <b>2008</b> , 182, 520         |
| <b>NPGLs</b>                         | 4.0 M NaOH + 10 wt.% N <sub>2</sub> H <sub>4</sub> | 195 (80 °C)   | 1.20 (N <sub>2</sub> H <sub>4</sub> /H <sub>2</sub> O <sub>2</sub> ) | <i>Sci. Rep.</i> <b>2012</b> , 2 ,941                   |
| <b>Cu film</b>                       | 4.0 M KOH + 20 % N <sub>2</sub> H <sub>4</sub>     | 160.8 (80 °C) | ~ 1.0 (N <sub>2</sub> H <sub>4</sub> /O <sub>2</sub> )               | <i>Adv. Mater.</i> <b>2015</b> , 27, 2361               |
| <b>Co-PPy/C</b>                      | 1.0 M KOH + 5 wt.% N <sub>2</sub> H <sub>4</sub>   | 75 (50 °C)    | 0.73 (N <sub>2</sub> H <sub>4</sub> /air)                            | <i>J. Electrochemical. Soc.</i> <b>2014</b> , 161, F889 |
| <b>Fe-CoS<sub>2</sub> nanosheets</b> | 4.0 M KOH + 20 wt.% N <sub>2</sub> H <sub>4</sub>  | 246 (80 °C)   | 1.80 (N <sub>2</sub> H <sub>4</sub> /H <sub>2</sub> O <sub>2</sub> ) | <i>This work</i>                                        |
|                                      |                                                    | 125 (80 °C)   | 1.03 (N <sub>2</sub> H <sub>4</sub> /O <sub>2</sub> )                |                                                         |

Supplementary Table 5 | OH<sub>2</sub>S performances in our work and the literature

| Bifunctional catalysts         | Electrolyte                                     | Cell Voltage                                                                     | Reference                                          |
|--------------------------------|-------------------------------------------------|----------------------------------------------------------------------------------|----------------------------------------------------|
| CoS <sub>2</sub> /TiM          | 1.0 M KOH + 0.1 M N <sub>2</sub> H <sub>4</sub> | 0.81 V at $j = 100 \text{ mA cm}^{-2}$                                           | <i>New J. Chem.</i> <b>2017</b> , 41, 4754         |
| Ni <sub>2</sub> P/NF           | 1.0 M KOH + 0.5 M N <sub>2</sub> H <sub>4</sub> | ~ 0.45 V at $j = 100 \text{ mA cm}^{-2}$                                         | <i>Angew. Chem. Int. Ed.</i> <b>2017</b> , 56, 842 |
| CoP/TiM                        | 1.0 M KOH + 0.1 M N <sub>2</sub> H <sub>4</sub> | 0.2 V at $j = 10 \text{ mA cm}^{-2}$                                             | <i>ChemElectroChem</i> <b>2017</b> , 4, 481        |
| FeP NA/NF                      | 1.0 M KOH + 0.5 M N <sub>2</sub> H <sub>4</sub> | 0.5 V at $j = 125 \text{ mA cm}^{-2}$                                            | <i>ChemistrySelect</i> <b>2017</b> , 2, 3401       |
| Cu <sub>3</sub> P/CF           | 1.0 M KOH + 0.5 M N <sub>2</sub> H <sub>4</sub> | 0.72 V at $j = 100 \text{ mA cm}^{-2}$                                           | <i>Inorg. Chem. Front.</i> <b>2017</b> , 4, 420    |
| Fe-CoS <sub>2</sub> nanosheets | 1.0 M KOH + 0.1 M N <sub>2</sub> H <sub>4</sub> | 0.61 V at $j = 100 \text{ mA cm}^{-2}$<br>0.95 V at $j = 500 \text{ mA cm}^{-2}$ | <i>This work</i>                                   |
|                                | 1.0 M KOH + 0.5 M N <sub>2</sub> H <sub>4</sub> | 0.26 V at $j = 100 \text{ mA cm}^{-2}$<br>0.42 V at $j = 500 \text{ mA cm}^{-2}$ |                                                    |

## Supplementary References

1. Zhang, J., Xiao, W., Xi, P., Xi, S., Du, Y., Gao, D. & Ding, J. Activating and optimizing activity of CoS<sub>2</sub> for hydrogen evolution reaction through the synergic effect of N dopants and S vacancies. *ACS Energy Lett.* **2**, 1022–1028 (2017).
2. Zhao, S., Jin, R., Song, Y., Zhang, H., House, S. D., Yang, J. C. & Jin, R. Atomically precise gold nanoclusters accelerate hydrogen evolution over MoS<sub>2</sub> nanosheets: the dual interfacial effect. *Small* **13**, 1701519 (2017).
3. Zhang, L., Han, L. L., Liu, H. X., Liu, X. J. & Luo, J. Potential-cycling synthesis of single platinum atoms for efficient hydrogen evolution in neutral media. *Angew. Chem. Int. Ed.* **56**, 13694–13698 (2017).
4. Li, H., Chen, S., Jia, X., Xu, B., Lin, H., Yang, H., Song, L. & Wang, X. Amorphous nickel-cobalt complexes hybridized with 1T-phase molybdenum disulfide via hydrazine-induced phase transformation for water splitting. *Nat. Commun.* **8**, 15377 (2017).
5. Tang, C., Zhang, R., Lu, W., Wang, Z., Liu, D., Hao, S., Du, G., Asiri, A. M. & Sun, X. Energy-saving electrolytic hydrogen generation: Ni<sub>2</sub>P nanoarray as a high-performance non-noble-metal electrocatalyst. *Angew. Chem. Int. Ed.* **56**, 842–846 (2017).
6. Zhang, J. & Dai, L. Nitrogen, phosphorus, and fluorine tri-doped graphene as a multifunctional catalyst for self-powered electrochemical water splitting. *Angew. Chem. Int. Ed.* **55**, 13296–13300 (2016).



7. Yang, J., Wang, X., Li, B., Ma, L., Shi, L., Xiong, Y. & Xu, H. Novel iron/cobalt-containing polypyrrole hydrogel-derived trifunctional electrocatalyst for self-powered overall water splitting. *Adv. Funct. Mater.* **27**, 1606497 (2017).
8. Yin, J., Li, Y., Lv, F., Lu, M., Sun, K., Wang, W., Wang, L., Cheng, F., Li, Y., Xi, P. & Guo, S. Oxygen vacancies dominated NiS<sub>2</sub>/CoS<sub>2</sub> interface porous nanowires for portable Zn–air batteries driven water splitting devices. *Adv. Mater.* **29**, 1704681 (2017).
9. Liang, H., Gandi, A. N., Anjum, D. H., Wang, X., Schwingenschlögl, U. & Alshareef, H. N. Plasma-assisted synthesis of NiCoP for efficient overall water splitting. *Nano Lett.* **16**, 7718–7725 (2016).
10. Mahmood, J., Li, F., Jung, S.-M., Okyay, M. S., Ahmad, I., Kim, S.-J., Park, N., Jeong, H. Y. & Baek, J.-B. An efficient and pH-universal ruthenium-based catalyst for the hydrogen evolution reaction. *Nat. Nanotech.* **12**, 441 (2017).
11. Zhang, R., Wang, X., Yu, S., Wen, T., Zhu, X., Yang, F., Sun, X., Wang, X. & Hu, W. Ternary NiCo<sub>2</sub>P<sub>x</sub> nanowires as pH-universal electrocatalysts for highly efficient hydrogen evolution reaction. *Adv. Mater.* **29**, 1605502 (2017).
12. McKone, J. R., Sadtler, B. F., Werlang, C. A., Lewis, N. S. & Gray, H. B. Ni–Mo nanopowders for efficient electrochemical hydrogen evolution. *ACS Catal.* **3**, 166–169 (2013).
13. Liang, H.-W., Brüller, S., Dong, R., Zhang, J., Feng, X. & Müllen, K. Molecular metal–N<sub>x</sub> centres in porous carbon for electrocatalytic hydrogen evolution. *Nat. Commun.* **6**, 7992 (2015).
14. Xiao, W., Liu, P., Zhang, J., Song, W., Feng, Y. P., Gao, D. & Ding, J. Dual-functional

- N dopants in edges and basal plane of MoS<sub>2</sub> nanosheets toward efficient and durable hydrogen evolution. *Adv. Energy Mater.* **7**, 1602086 (2017).
15. Laursen, A. B., Patraju, K. R., Whitaker, M. J., Retuerto, M., Sarkar, T., Yao, N., Ramanujachary, K. V., Greenblatt, M. & Dismukes, G. C. Nanocrystalline Ni<sub>5</sub>P<sub>4</sub>: a hydrogen evolution electrocatalyst of exceptional efficiency in both alkaline and acidic media. *Energy Environ. Sci.* **8**, 1027–1034 (2015).
  16. Popczun, E. J., Read, C. G., Roske, C. W., Lewis, N. S. & Schaak, R. E. Highly active electrocatalysis of the hydrogen evolution reaction by cobalt phosphide nanoparticles. *Angew. Chem. Int. Ed.* **53**, 5427–5430 (2014).
  17. Cummins, D. R., Martinez, U., Koppera, R., Voiry, D., Martinez-Garcia, A., Jasinski, J.; Kelly, D., Chhowalla, M., Mohite, A. D., Sunkara, M. K. & Gupta, G. Catalytic activity in lithium-treated core–shell MoO<sub>x</sub>/MoS<sub>2</sub> nanowires. *J. Phys. Chem. C* **119**, 22908–22914 (2015).
  18. Jasion, D., Barforoush, J. M., Qiao, Q., Zhu, Y., Ren, S. & Leonard, K. C. Low-dimensional hyperthin FeS<sub>2</sub> nanostructures for efficient and stable hydrogen evolution electrocatalysis. *ACS Catal.* **5**, 6653–6657 (2015).
  19. Gupta, S., Patel, N., Fernandes, R., Kadrekar, R., Dashora, A., Yadav, A. K., Bhattacharyya, D., Jha, S. N., Miotello, A. & Kothari, D. C. Co–Ni–B nanocatalyst for efficient hydrogen evolution reaction in wide pH range. *Appl. Catal. B: Environ.* **192**, 126–133 (2016).
  20. Lee, R.-L., Tran, P. D., Pramana, S. S., Chiam, S. Y., Ren, Y., Meng, S., Wong, L. H. & Barber, J. Assembling graphitic-carbon-nitride with cobalt-oxide-phosphate to

construct an efficient hybrid photocatalyst for water splitting application. *Catal. Sci. Tech.* **3**, 1694–1698 (2013).

21. Li, Y., Yu, Y., Huang, Y., Nielsen, R. A., Goddard, W. A., Li, Y. & Cao, L. Engineering the composition and crystallinity of molybdenum sulfide for high-performance electrocatalytic hydrogen evolution. *ACS Catal.* **5**, 448–455 (2015).
