# Supplementary material for: Self-powered H2 production with bifunctional hydrazine as sole consumable
Source: PubMed Central journal article supplement (PMC6195518; doi:10.1038/s41467-018-06815-9), 2018-10-19
Supplement: 41467_2018_6815_MOESM3_ESM.pdf [file 41467_2018_6815_MOESM3_ESM.pdf]

## **Description of Additional Supplementary Files**

File Name: Supplementary Movie 1

Description: A working overall-hydrazine-splitting unit driven by an electrochemical workstation

File Name: Supplementary Movie 1

Description: A working self-powered overall-hydrazine-splitting system
